# Supplementary material for: Identification of Genes Essential for Fluorination and Sulfamylation within the Nucleocidin Gene Clusters of Streptomyces calvus and Streptomyces virens
Source: PubMed Central journal article supplement (PMC10946740; doi:10.1002/cbic.202200684), 2023-01-26
Supplement: CBIC-24-0-s001.pdf [file CBIC-24-0-s001.pdf]

# ChemBioChem

Supporting Information

## **Identification of Genes Essential for Fluorination and Sulfamylation within the Nucleocidin Gene Clusters of *Streptomyces calvus* and *Streptomyces virens***

Marta Wojnowska, Xuan Feng, Yawen Chen, Hai Deng, and David O'Hagan\*

| <b>Index</b>                              | <b>Page</b> |
|-------------------------------------------|-------------|
| <b>1. General experimental procedures</b> | <b>2</b>    |
| <b>2. Supplementary tables</b>            | <b>6</b>    |
| <b>3. Supplementary figures</b>           | <b>15</b>   |
| <b>4. References</b>                      | <b>29</b>   |

## 1. General experimental procedures

Room temperature refers to 18-25 °C. All microbiological work was carried out in a Gallenkamp laminar flow hood. Glassware and consumables for biological operations were sterilised by autoclaving or wiping with 70% ethanol before using. Sterilised consumables were used as supplied. Media were sterilised by autoclaving. Cell cultures were incubated in a temperature-controlled orbital incubator (New Brunswick Scientific). Centrifugation of 20 mL to 1 L was processed by Beckman Avanti centrifuge. A ThermoFisher Heraeus Fresco 21 benchtop refrigerated centrifuge was used for micro-centrifugation. All evaporations and concentrations were performed under reduced pressure (*in vacuo*) by Büchi Rotavapor R-200.

### <sup>19</sup>F {<sup>1</sup>H} NMR analysis

<sup>19</sup>F NMR and <sup>19</sup>F {<sup>1</sup>H} NMR spectra were recorded at 298 K on Bruker Advance II 400, Advance III HD 500 instruments using CFCl<sub>3</sub> as an external reference. Chemical shifts are reported in parts per million (ppm) and coupling constants (*J*) are reported in Hertz (Hz).

### LC-MS analysis

Extracts from culture media were freeze dried, resuspended in 50% acetonitrile to about half the original volume and centrifuged at maximum speed for 10 min to remove particulates. These samples were analysed at the Mass Spectrometry Facility at the University of St Andrews using ThermoFisher Xcalibur Orbitrap instrument in positive ion mode. Due to low abundance of metabolites some samples were partially purified by HPLC; majority of the acetonitrile/water elution fractions were collected and after removing the solvent the dry extracts were resuspended in water. High resolution electrospray ionization spectra were acquired on a Bruker MaXis II ESI-Q-TOF-MS connected to a Dionex 3000 RS UHPLC fitted with an ACE C4-300 RP column (100 x 2.1 mm, 5 µm, 30°C). The metabolites were eluted with a linear gradient of 5–100% MeCN containing 0.1% formic acid over 30 min. The mass spectrometer was operated in positive ion mode with a scan range of 200–3000 *m/z*. Source conditions: end plate offset at –500 V; capillary at –4500 V; nebulizer gas (N<sub>2</sub>) at 1.8 bar; dry gas (N<sub>2</sub>) at 9.0 L min<sup>-1</sup>; dry temperature at 200 °C. Ion transfer conditions: ion funnel RF at 400 Vpp; multiple RF at 200 Vpp; quadrupole low mass at 200 *m/z*; collision energy at 8.0 eV; collision RF at 2000 Vpp; transfer time at 110.0 µs; pre-pulse storage time at 10.0 µs. MS data were analysed using Bruker DataAnalysis.

## Plasmid design and construction

All the primers were synthesised by Merck. Plasmids and, where necessary, PCR products were sequenced by Eurofins Genomics. Table S1 shows the list of plasmids used and/or generated in this study while Tables S2-4 contain primers that were used for PCR and sequencing. Amplification of genes intended for cloning was conducted with Q5 High Fidelity polymerase (NEB) supplemented with 7.5% DMSO while Ultra polymerase (PCR Biosystems) with 2.5% DMSO was employed for colony screening and general verifications. Both polymerases were used according to the manufacturers' protocols with the usual annealing temperatures of 59-62°C (Ultra) and 62-65°C (Q5). PCR products used in cloning were gel extracted and then subjected to an additional DNA purification using Monarch DNA kits (NEB). NEBuilder HiFi assembly master mix (NEB) was used to insert DNA fragments into the target vectors, following manufacturer's protocol. The assembly reactions were diluted 4-fold with distilled water and 15µl were then transformed into 100µl chemically competent *E. coli* DH10β (Thermo Scientific). The resulting colonies were screened by PCR using different combinations of gene-specific cloning and verification primers (listed in Table S1), as well as vector-specific primers; for the knockout vectors pKC1139seqF (5'-GCCAGGGTTTTCCCAGTCACGACG-3') and pKC1139seqR (5'-CCGGCTCGTATGTTGTGTGGAATTGTGAG-3') while for the complementation/expression vectors pGM1190seqF (5'-GGAACGTCCGGGCTTGACCTCACGTC-3') and pGM1190seqR (5'-CAAACTTTAGATCTGGGTTAGCAGCCGG-3').

The inserts for "native" vectors were generated by amplifying the gene(s) of interest along with ~200 bp of upstream sequence. The 5' end of these inserts were complementary to a sequence upstream of *tipA* and the 3' end contained the natural stop codon, so that the inducible promoter was replaced with a native one, and no affinity tag was present on the resulting gene product. For screening and sequencing of this type of plasmid pGM1190(noInd)F primer (5'-GGCGCGACAAGTTGCTGCGATTCTCACC-3') was employed in place of pGM1190seqF.

Double-expression *orf2+orf3* plasmid was constructed using pGM1190-Orf3his as the backbone and pGM1190-Orf2his as a template for insert amplification. The strategy exploited a unique cleavage site – BglII cuts right after the *his6* region but before the terminator sequence. The RBS-*orf2-his6* amplicon was inserted into BglII-digested pGM1190-Orf3his plasmid using the NEBuilder assembly kit, resulting in a tandem-expression construct which would be transcribed as a bicistronic mRNA. Gene order was deliberately inverted, so that *orf2* is after *orf3*, to ensure the expression is regulated by vector-borne genetic elements rather than the native ones. Screening and sequencing employed primers BglIIseqF (5'-

CACTGAGATCCGGCTGCTAACCCAGATC-3') and BglIIseqR (5'-GTTCCCTTTCTATTCTCACTCCGCTGAAACTG-3').

Most gene knockouts involved the removal of between half and two-thirds of the target gene, including the start codon. In three cases the start codon was mutated due to a partial overlap of the target gene with the upstream gene; for *orf2* deletion the last four nucleotides of *nucU* were changed from **GTGA** into GTAG, for *nucK* knockout the last four nucleotides of *nucJ* were mutated from **ATGA** into CTA A and for *nucP* knockout the seven base pair overlap with preceding *nucQ* was changed from **ATGAGTGA** into AGGAATGA. In the case of *orf(-2)* knockout the start codon was retained due to 17bp overlap with the upstream gene, however a stop codon was inserted in frame immediately after the starting sequence. The *nucO* deletion was accidentally made so that the four nucleotides overlapping with the preceding *nucP* gene were joined with the terminal 24bp of *nucO*, resulting in a frame shift which would eliminate the natural stop codon. However, the generation of a long nonsense polypeptide is probably prevented by the transcription terminator, most likely located in the sequence of the downstream gene (*nucV*). The intermediate phenotype conferred by this gene knockout and the fact that was readily complemented *in trans* suggests that despite the mistake, the phenotype is likely to be real and the frameshift did not affect the cells in a negative way. One other unintended change occurred in the process of *orf3* knockout, where the third base of the natural *orf2* stop codon was accidentally removed and the resulting *orf2* gene product in  $\Delta$ *orf3* cells contained additional two amino acids at the C terminus (Trp, Glu). However, as the difference was marginal and the phenotype associated with the absence of *orf3* was readily complemented the sequence of *orf2* was not fixed in this knockout strain.

### **Plasmid conjugation into *Streptomyces* cells**

Knockout and complementation plasmids were transformed into *E. coli* ET12567/pUZ8002, which are capable of plasmid conjugation into *Streptomyces* cells. Cell pellets from overnight cultures of these cells were washed twice with LB medium and the mycelium of the target *Streptomyces* was harvested and resuspended in LB. Different *E. coli* ETU to *Streptomyces* ratios were used for conjugation, and the cell mixtures were plated onto ISP4 agar plates. After ~20 hours of incubation at 30°C the plates were overlaid with 1 ml LB containing 0.5 mg nalidixic acid and 1.25 mg apramycin, allowed to dry and incubated for a few days until the appearance of streptomycete colonies.

### **Gene knockout procedure**

Figure S1 shows an overview of the gene deletion approach employed here. *Streptomyces* cells harbouring the knockout vector were plated onto ISP4 agar containing 50 µg ml<sup>-1</sup> apramycin and incubated at 37°C overnight. The colonies were then re-plated onto ISP4 agar

without antibiotic and incubated at 30°C for 1-2 days to allow for the double crossover and plasmid loss; the process was repeated several times after which the colonies were replica-plated on plates with and without antibiotic to test for plasmid presence. Colonies that lost apramycin resistance were screened using gene-specific verification primers to verify their knockout status. Additional verification primers were sometimes employed if the PCR results were not clear enough.

## 2. Supplementary tables

**Table S1.** List of plasmids used in this study.

| PLASMID                    | INDUCIBLE | DESCRIPTION                                                                                                                                                         | SOURCE    |
|----------------------------|-----------|---------------------------------------------------------------------------------------------------------------------------------------------------------------------|-----------|
| pKC1139                    | NO        | Vector for gene knockouts in <i>Streptomyces</i>                                                                                                                    | [1]       |
| pGM1190                    | YES       | Vector for thiostrepton-inducible gene expression in <i>Streptomyces</i>                                                                                            | [2]       |
| pKC-nucA                   | NO        | Knockout vector for <i>nucA</i>                                                                                                                                     | This work |
| pKC-nucW <sub>1</sub> (c1) | NO        | Knockout vector for <i>nucW<sub>1</sub></i> in PAPS cluster 1                                                                                                       | This work |
| pKC-nucW <sub>1</sub> (c2) | NO        | Knockout vector for <i>nucW<sub>1</sub></i> in PAPS cluster 2                                                                                                       | This work |
| pKC-orf(-6)                | NO        | Knockout vector for <i>orf(-6)</i>                                                                                                                                  | This work |
| pKC-orf(-5)                | NO        | Knockout vector for <i>orf(-5)</i>                                                                                                                                  | This work |
| pKC-orf(-4)                | NO        | Knockout vector for <i>orf(-4)</i>                                                                                                                                  | This work |
| pKC-orf(-3)                | NO        | Knockout vector for <i>orf(-3)</i>                                                                                                                                  | This work |
| pKC-orf(-2)                | NO        | Knockout vector for <i>orf(-2)</i>                                                                                                                                  | This work |
| pKC-orf(-1)                | NO        | Knockout vector for <i>orf(-1)</i>                                                                                                                                  | This work |
| pKC-orf1                   | NO        | Knockout vector for <i>orf1</i>                                                                                                                                     | This work |
| pKC-nucU                   | NO        | Knockout vector for <i>nucU</i>                                                                                                                                     | This work |
| pKC-orf2                   | NO        | Knockout vector for <i>orf2</i>                                                                                                                                     | This work |
| pKC-orf3                   | NO        | Knockout vector for <i>orf3</i>                                                                                                                                     | This work |
| pKC-orf2orf3               | NO        | Knockout vector for <i>orf2</i> and <i>orf3</i> together                                                                                                            | This work |
| pKC-orf4                   | NO        | Knockout vector for <i>orf4</i>                                                                                                                                     | This work |
| pKC-orf5                   | NO        | Knockout vector for <i>orf5</i>                                                                                                                                     | This work |
| pKC-nucR                   | NO        | Knockout vector for <i>nucR</i>                                                                                                                                     | This work |
| pKC-nucM                   | NO        | Knockout vector for <i>nucM</i>                                                                                                                                     | This work |
| pKC-nucG                   | NO        | Knockout vector for <i>nucG</i>                                                                                                                                     | This work |
| pKC-nucN                   | NO        | Knockout vector for <i>nucN</i>                                                                                                                                     | This work |
| pKC-nucI                   | NO        | Knockout vector for <i>nucI</i>                                                                                                                                     | This work |
| pKC-nucJ                   | NO        | Knockout vector for <i>nucJ</i>                                                                                                                                     | This work |
| pKC-nucK                   | NO        | Knockout vector for <i>nucK</i>                                                                                                                                     | This work |
| pKC-nucL                   | NO        | Knockout vector for <i>nucL</i>                                                                                                                                     | This work |
| pKC-nucQ                   | NO        | Knockout vector for <i>nucQ</i>                                                                                                                                     | This work |
| pKC-nucP                   | NO        | Knockout vector for <i>nucP</i>                                                                                                                                     | This work |
| pKC-nucO                   | NO        | Knockout vector for <i>nucO</i>                                                                                                                                     | This work |
| pKC-nucV                   | NO        | Knockout vector for <i>nucV</i>                                                                                                                                     | This work |
| pKC-nucPNP                 | NO        | Knockout vector for <i>nucPNP</i>                                                                                                                                   | This work |
| pKC-orf9                   | NO        | Knockout vector for <i>orf9</i>                                                                                                                                     | This work |
| pGM-nucA                   | YES       | Expression vector for NucA                                                                                                                                          | This work |
| pGM(noInd)-nucA            | NO        | Native expression vector for NucA                                                                                                                                   | This work |
| pGM-orf(-3)his             | YES       | Expression vector for 6His-tagged Orf(-3)                                                                                                                           | This work |
| pGM(noInd)-orf(-3)         | NO        | Native expression vector for Orf(-3)                                                                                                                                | This work |
| pGM-orf2his                | YES       | Expression vector for 6His-tagged Orf2                                                                                                                              | This work |
| pGM(noInd)-orf2            | NO        | Native expression vector for Orf2                                                                                                                                   | This work |
| pGM(noInd)-nucU+orf2       | NO        | Native expression vector for NucU and Orf2                                                                                                                          | This work |
| pGM(noInd)-orf2+orf3       | NO        | Native expression vector for Orf2 and Orf3                                                                                                                          | This work |
| pGM-orf3his                | YES       | Expression vector for 6His-tagged Orf3                                                                                                                              | This work |
| pGM(noInd)-orf3            | NO        | Native expression vector for Orf3                                                                                                                                   | This work |
| pGM-orf2his+orf3his        | YES       | Expression vector for Orf3-6His and Orf2-6His; the corresponding genes share the <i>tipA</i> promoter and the terminator but have individual ribosome binding sites | This work |
| pGM-nucN                   | YES       | Expression vector for NucN                                                                                                                                          | This work |

|             |     |                                        |           |
|-------------|-----|----------------------------------------|-----------|
| pGM-nucK    | YES | Expression vector for NucK             | This work |
| pGM-nucQhis | YES | Expression vector for 6His-tagged NucQ | This work |
| pGM-nucOhis | YES | Expression vector for 6His-tagged NucO | This work |



**Table S2.** List of primers used to construct left (LA) and right arms (RA) flanking the target genes.

| TARGET GENE                  | PRIMER NAME                   | PRIMER SEQUENCE                               |
|------------------------------|-------------------------------|-----------------------------------------------|
| <i>nucA</i>                  | <i>nucA</i> _LA_F             | GACGGCCAGTGCCAAGCTTCATCACCGACCGGCAGAACGTCC    |
|                              | <i>nucA</i> _LA_R             | GGTGAGACCGGTGAGTTCGGGTCAGCCGTGCAGTCCGCACTCG   |
|                              | <i>nucA</i> _RA_F             | CGAACTCACCGGTCTCACCGGTGTGGACG                 |
|                              | <i>nucA</i> _RA_R             | GACATGATTACGAATTCACCGGTGGCTCGACGTCTGCGTG      |
| <i>nucW<sub>1</sub></i> (c1) | <i>nucW<sub>1</sub></i> _LA_F | GACGGCCAGTGCCAAGCTTCACCTTCGGCAAGCGTTCTGCGTG   |
|                              | <i>nucW<sub>1</sub></i> _LA_R | CGGTGATCGTGGTCCGTCTAGAAGTACCCTCGCGCTTG        |
|                              | <i>nucW<sub>1</sub></i> _RA_F | GGACGACCACGATCACCGGGATCGACTG                  |
|                              | <i>nucW<sub>1</sub></i> _RA_R | GACATGATTACGAATTCGAGGGCGAGTTCGATGTTCTTGCC     |
| <i>nucW<sub>1</sub></i> (c2) | <i>nucW<sub>2</sub></i> _LA_F | GACGGCCAGTGCCAAGCTTGAGTTCCTCGTGCAGGACGTCCC    |
|                              | <i>nucW<sub>2</sub></i> _LA_R | GCGCGAAGGATACTTCTGAGGTCATCAGCGGCATCGACTGCTG   |
|                              | <i>nucW<sub>2</sub></i> _RA_F | CAGAAGTATCCTTCGCGCTTGGGTCTCC                  |
|                              | <i>nucW<sub>2</sub></i> _RA_R | GACATGATTACGAATTCGCTTGGTGAACCTCGTGGTGTGACG    |
| <i>orf(-6)</i>               | <i>orf-6</i> _LA_F            | GACGGCCAGTGCCAAGCTTGAACGCTGATCATCAGCGCGAAGC   |
|                              | <i>orf-6</i> _LA_R            | GTCCCGGTACTTGATGAGCACCTGGAATGTCATGGGCTCGAG    |
|                              | <i>orf-6</i> _RA_F            | CGTTCATCAAGTACCGGGACTGTTCG                    |
|                              | <i>orf-6</i> _RA_R            | GACATGATTACGAATTCGCTCGGTGTGACAGGGTTCGACACC    |
| <i>orf(-5)</i>               | <i>orf-5</i> _LA_F            | GACGGCCAGTGCCAAGCTTCTGGCGGTGCTCGTGCCTGCGG     |
|                              | <i>orf-5</i> _LA_R            | GCGAGTTCACCGATCATCGTTCACGGTGCAGGATGTTGAGAG    |
|                              | <i>orf-5</i> _RA_F            | GGATGATCGGTGAACTCGCCGTCCACG                   |
|                              | <i>orf-5</i> _RA_R            | GACATGATTACGAATTCGGCCGTTTCGACGACGTGATCAC      |
| <i>orf(-4)</i>               | <i>orf-4</i> _LA_F            | GACGGCCAGTGCCAAGCTTCGTTCTCGATGAGGAGCGTCTCGG   |
|                              | <i>orf-4</i> _LA_R            | GTACGCCCGGTGCCGAGGATTCCCTACTGATGAGTATTCG      |
|                              | <i>orf-4</i> _RA_F            | CTGATGCTCCTCGGCACGGCGGCTAC                    |
|                              | <i>orf-4</i> _RA_R            | GACATGATTACGAATTCGCGTACTCGGCGGTGAACAGGTACG    |
| <i>orf(-3)</i>               | <i>orf-3</i> _LA_F            | GACGGCCAGTGCCAAGCTTGCCAGACCGAGCACCGTCAGCGC    |
|                              | <i>orf-3</i> _LA_R            | GTACACGTTGGAGAAGTCGCGCACCTTCTCCTGTAAGTGGTCC   |
|                              | <i>orf-3</i> _RA_F            | CGCGACTTCTCCAACGTGTACAACACCTC                 |
|                              | <i>orf-3</i> _RA_R            | GACATGATTACGAATTCGCCAGGGGACACCTTTCGAGG        |
| <i>orf(-2)</i>               | <i>orf-2</i> _LA_F            | GACGGCCAGTGCCAAGCTTCATGACCACGGATTCCGATTATC    |
|                              | <i>orf-2</i> _LA_R            | GTTTCGACCACCTGGATGTCTAGTCAGGCGGTCCGGCCATCGCC  |
|                              | <i>orf-2</i> _RA_F            | GGACATCCAGGTGGTGAACCTGCCCTGG                  |
|                              | <i>orf-2</i> _RA_R            | GACATGATTACGAATTCGCGAACGTGGCCACGCCGTGAGG      |
| <i>orf(-1)</i>               | <i>orf-1</i> _LA_F            | GACGGCCAGTGCCAAGCTTCTGGGACGTTCCGCCGGCAGTTC    |
|                              | <i>orf-1</i> _LA_R            | CCGAAGGTGAGCCGGACCGGTGTCTTTCGACGTGTCGTCC      |
|                              | <i>orf-1</i> _RA_F            | CACGGTCCGGCTCACCTTCGGCGACG                    |
|                              | <i>orf-1</i> _RA_R            | GACATGATTACGAATTCGGGATGCCAGATCGAGCATGATTC     |
| <i>orf1</i>                  | <i>orf1</i> _LA_F             | GACGGCCAGTGCCAAGCTTGAGTTACGCGACGAGCTCATCCATG  |
|                              | <i>orf1</i> _LA_R             | GTGGAGCCGGTGCCTCCAGCCTCCAGGGTTCGATGCCACC      |
|                              | <i>orf1</i> _RA_F             | CTGGACGCACCGGCTCCACGACACGC                    |
|                              | <i>orf1</i> _RA_R             | GACATGATTACGAATTCGCCTTCTCCTCGCCGTCGAACAC      |
| <i>nucU</i>                  | <i>nucU</i> _LA_F             | GACGGCCAGTGCCAAGCTTGCCATCGAGCTCGTACAGGGCGAGG  |
|                              | <i>nucU</i> _LA_R             | GAACAGCAGCCGGTACGCCCGCCAGCGCGTTCGTAACGTGG     |
|                              | <i>nucU</i> _RA_F             | GGCGTACCGGCTGCTGTTCTGCTGGTGC                  |
|                              | <i>nucU</i> _RA_R             | GACATGATTACGAATTCGGTGGTGGCCGGATCGGTGCTACTCC   |
| <i>orf2</i>                  | <i>orf2</i> _LA_F             | GACGGCCAGTGCCAAGCTTGACGGCCTGCCAAGAGGTGGTGC    |
|                              | <i>orf2</i> _LA_R             | GTCGAGCCAGACGAAGAACCTACTTCAGGTGCTCCTTCGGGTGAG |
|                              | <i>orf2</i> _RA_F             | CGTTCCTGCTGGCTCGACGAGCGGGAC                   |
|                              | <i>orf2</i> _RA_R             | GACATGATTACGAATTCGCGGTGCCGGGTGTTCTTCGCGG      |
| <i>orf3</i>                  | <i>orf3</i> _LA_F             | GACGGCCAGTGCCAAGCTTGTGCGATCGCGGCGTTGCTGGTGG   |
|                              | <i>orf3</i> _LA_R             | GCACCGTCTTGATCACTCCAGCTCTCTCGCATGCCAGCGC      |
|                              | <i>orf3</i> _RA_F             | CGGAGTGATCAAGACGGTGTGCTGCGGTCG                |

|                  |            |                                                 |
|------------------|------------|-------------------------------------------------|
|                  | orf3_RA_R  | GACATGATTACGAATTCGCCATCTCGAACACGGCGCTGATGG      |
| <i>orf2+orf3</i> | orf23_LA_F | GACGGCCAGTGCCAAGCTTGACGCTCGACCTGGTCGTGGTGGCC    |
|                  | orf23_LA_R | CCGACTCCACCAGTTCGGTATTTTCAGGTGCTCCTTCGGGTGAGATG |
|                  | orf23_RA_F | CCTGGCGGAACTGGTGGAGTCGGCGGACG                   |
|                  | orf23_RA_R | GACATGATTACGAATTCGGCGCTGCTCGTTGGCGAGACGGCC      |
| <i>orf4</i>      | orf4_LA_F  | GACGGCCAGTGCCAAGCTTGCTGTTCTCGCGCGGTGTACTGG      |
|                  | orf4_LA_R  | CAACCGGGCACGCCGACGCCGCTTGTACGTCGTGCGCAGCG       |
|                  | orf4_RA_F  | GGATCGTCGGGCGTGCCCGTTGCTGTGC                    |
|                  | orf4_RA_R  | GACATGATTACGAATTCGGGGTACACCGTCTGCGCCGTGAC       |
| <i>orf5</i>      | orf5_LA_F  | GACGGCCAGTGCCAAGCTTGACGACGCCGTAACGCCGGCAG       |
|                  | orf5_LA_R  | CCGTCCGCCGTGGGAGAAAGGTCGCGGCGCAGGAAACGGAAGG     |
|                  | orf5_RA_F  | CCTTCTCCACGGCGGACGGTCGTGGG                      |
|                  | orf5_RA_R  | GACATGATTACGAATTCGCCGTACGGGGCGGATCAGTCGTGC      |
| <i>nucR</i>      | nucR_LA_F  | GACGGCCAGTGCCAAGCTTCCCATGTGACACCGAGTAGCCAG      |
|                  | nucR_LA_R  | CACCACCGCCTCCACCATGCTCTACGGCTCGTCACAGGAATGTC    |
|                  | nucR_RA_F  | CCATGGTGGAGGCGGTGGTGTGCGC                       |
|                  | nucR_RA_R  | GACATGATTACGAATTCGGCGACATCGTTATCCTCCGTGACG      |
| <i>nucM</i>      | nucM_LA_F  | GACGGCCAGTGCCAAGCTTCCGTTTCTGCGCCGCGACCGG        |
|                  | nucM_LA_R  | CTCGTCGTGTGCGCCTCCCGGCGGTGAACATTTACCGTCG        |
|                  | nucM_RA_F  | GGAGGCCGACAGCGACGAGCAGCGTCTGG                   |
|                  | nucM_RA_R  | GACATGATTACGAATTCGCCAGCACGGTCCGCTCGTCGACCC      |
| <i>nucG</i>      | nucG_LA_F  | GACGGCCAGTGCCAAGCTTGCGTCAGTCGGCGGGAGTGTGCGC     |
|                  | nucG_LA_R  | CGGATCCGTTGGTGTGCGGATGCGTCGGGACGCGGAAAGG        |
|                  | nucG_RA_F  | GCACACCAACCGGATCCGGACGGTCGAC                    |
|                  | nucG_RA_R  | GACATGATTACGAATTCGCGGCGAGGACCTGGCGGGCTGG        |
| <i>nucN</i>      | nucN_LA_F  | GACGGCCAGTGCCAAGCTTCTCCACGGCCGTCATATACGGAC      |
|                  | nucN_LA_R  | CAGGATGCCGGTGAGGCAGGTCAGACCGAGTAGCCAGCGC        |
|                  | nucN_RA_F  | CTGCCTCACGGCATCCTGCGCCGCGACG                    |
|                  | nucN_RA_R  | GACATGATTACGAATTCGCTGCGGCCGGTACGCAGACGCTC       |
| <i>nucI</i>      | nucI_LA_F  | GACGGCCAGTGCCAAGCTTGACTCCACGCCGTACAGGATGATG     |
|                  | nucI_LA_R  | GGTCTGTTGGGGTACCAGCCCCTTTCGCGGGTGTGATGGAGC      |
|                  | nucI_RA_F  | GGCTGGTACCCCAACGACCACTCCGGC                     |
|                  | nucI_RA_R  | GACATGATTACGAATTCGCTGATCATCGTGGTGACGACGTGG      |
| <i>nucJ</i>      | nucJ_LA_F  | GACGGCCAGTGCCAAGCTTGTCCAGCGCACCGCCGACAGC        |
|                  | nucJ_LA_R  | GTTGAGGTGGTGCATCTCCGATCTCTAGCTGGACATGCG         |
|                  | nucJ_RA_F  | GGAGATCGACCACCTGAACTGGCTGTGCG                   |
|                  | nucJ_RA_R  | GACATGATTACGAATTCGCTCGAAGTACTCCTCGTGTGCG        |
| <i>nucK</i>      | nucK_LA_F  | GACGGCCAGTGCCAAGCTTGCGGTCTGCACGTGCTGCGCAAGG     |
|                  | nucK_LA_R  | GGACCTGTGGTGTCTGAGCTTAGGCCTCGTTGACGCCGGCCAGCGAG |
|                  | nucK_RA_F  | CATGCTCGAGACCACAGTCCGCGGACG                     |
|                  | nucK_RA_R  | GACATGATTACGAATTCGGCGTTGTCGAGCAGTTCGAGCACC      |
| <i>nucL</i>      | nucL_LA_F  | GACGGCCAGTGCCAAGCTTTCGAGGCCAAGCGCACCCGGCCG      |
|                  | nucL_LA_R  | CTCGCAGCCGGCCTTGGCGTACAGGTCGTGTCGGATGGTGTGCG    |
|                  | nucL_RA_F  | GCCAAGGCCGGCTGCGAGCAGACGCGGAC                   |
|                  | nucL_RA_R  | GACATGATTACGAATTCGCGACGCGGTGAGGCGGGTGGAGG       |
| <i>nucQ</i>      | nucQ_LA_F  | GACGGCCAGTGCCAAGCTTGACAAGTGCAGCGAGCCGAGGTTG     |
|                  | nucQ_LA_R  | GTCGGCCTGCCCTCCTCGGTTCTCCTACTGCGCGGGG           |
|                  | nucQ_RA_F  | GAGGAGGGGACAGGCCGACACCGCGAGCTG                  |
|                  | nucQ_RA_R  | GACATGATTACGAATTCGGTGCAACGACGACGTGGGGTTCGGG     |
| <i>nucP</i>      | nucP_LA_F  | GACGGCCAGTGCCAAGCTTGCTGCAAGAGCACGTTTCATGGTGG    |
|                  | nucP_LA_R  | CAGGGAGACCACCGGTCATTGCTCGGCTCCTCCAGGGATGAGGGC   |
|                  | nucP_RA_F  | GTGATCAACCGGTACGCCGCCGCGCACAAAC                 |
|                  | nucP_RA_R  | GACATGATTACGAATTCGCTCGAAGCGCAGCGTCAGGCTGTCC     |
|                  | nucO_LA_F  | ACGGCCAGTGCCAAGCTTAACTGCTCGACAACGCGGTGGACGA     |

|               |             |                                                |
|---------------|-------------|------------------------------------------------|
| <i>nucO</i>   | nucO_LA_R   | TCAGATCCAGTGTGCGGGGTCGGTTCACAGGGGCTTCTGAGCGAGT |
|               | nucO_RA_F   | ACCGACCCCGCACACTGGATCTGACGGA                   |
|               | nucO_RA_R   | TGACATGATTACGAATTCTACGTACGGTCGATGACCTGGT       |
| <i>nucV</i>   | nucV_LA_F   | GACGGCCAGTGCCAAGCTTGACCCACCGTGTGCTGGACCCG      |
|               | nucV_LA_R   | GAGTTCGATCGCCGCTCGCCGTCAGATCCAGTGTGCGGGG       |
|               | nucV_RA_F   | CGAGGCGGCGATCGAACTCGTCCACTCCAC                 |
|               | nucV_RA_R   | GACATGATTACGAATTCGGTCGTCGCCGACACCGTCGGCTGG     |
| <i>nucPNP</i> | nucPNP_LA_F | GACGGCCAGTGCCAAGCTTGGTACTACGACCTGCCGCCGACCTG   |
|               | nucPNP_LA_R | CAGTACGGGTCGGCCATGGCTGCCTGCCCGGTGCGGAGTTCATCC  |
|               | nucPNP_RA_F | CCATGGCCGACCCGTA CTGTTCCACCGG                  |
|               | nucPNP_RA_R | GACATGATTACGAATTCGCCGACGACCATGTCCACGAAGGCC     |
| <i>orf9</i>   | orf9_LA_F   | CGGCCAGTGCCAAGCTTCAGGAGCCGGACTCCGGTCATG        |
|               | orf9_LA_R   | CAGCTGTGGTCGCCCTCGGACCTGAAACACCGGCTGCATG       |
|               | orf9_RA_F   | GAGGGCGACCACAGCTGGATGGGCATCC                   |
|               | orf9_RA_R   | GACATGATTACGAATTCGCCGCTCCGACCAGGTCTCCTTCC      |

**Table S3.** List of primers used for knockout verification and plasmid sequencing.

| TARGET GENE                  | PRIMER NAME                 | PRIMER SEQUENCE               |
|------------------------------|-----------------------------|-------------------------------|
| <i>nucA</i>                  | <i>nucA_vF1</i>             | CAAGGTCGAGCCGCTGGAGGAAGGTC    |
|                              | <i>nucA_vF2</i>             | CTACATCGAGCGGGTGCTCAACCGCTTCC |
|                              | <i>nucA_vR</i>              | GTGTCCTCATCGACGGTCGCGACGGTCG  |
| <i>nucW<sub>1</sub> (c1)</i> | <i>nucW<sub>1</sub>_vF1</i> | CCGAGCTGGACGTGTGGCAGTACATC    |
|                              | <i>nucW<sub>1</sub>_vF2</i> | GGTATGTCCTTACGATCGCCTTGAC     |
|                              | <i>nucW<sub>1</sub>_vR</i>  | CATGACGACCGTCGCGACCGTCGATG    |
| <i>nucW<sub>1</sub> (c2)</i> | <i>nucW<sub>2</sub>_vF1</i> | GGTGAGGGTCGATCCGTCGGCCGG      |
|                              | <i>nucW<sub>2</sub>_vF2</i> | GAGATCCAGTTGAGCAGGGCCACGTC    |
|                              | <i>nucW<sub>2</sub>_vR</i>  | CCGAAGGACGGCGAACC GG TGGAG    |
| <i>orf(-6)</i>               | <i>orf-6_vF1</i>            | GGTTGTCGCCTCCGAACCGACCAGG     |
|                              | <i>orf-6_vF2</i>            | CCCTACTGATGAGTATTTCTAGGCTG    |
|                              | <i>orf-6_vR</i>             | GATGAGCTCGATCAGGCAGCGGCCGTC   |
| <i>orf(-5)</i>               | <i>orf-5_vF1</i>            | CCCTACTGATGAGTATTTCTAGGCTG    |
|                              | <i>orf-5_vF2</i>            | GGTTGTCGCCTCCGAACCGACCAGG     |
|                              | <i>orf-5_vR</i>             | CGTGGCTGCCGAGGAACACGAACAGTC   |
| <i>orf(-4)</i>               | <i>orf-4_vF1</i>            | GGTTCACGGTGCGGATGTTGAGAGG     |
|                              | <i>orf-4_vF2</i>            | GACGATGAGCACTTTGACGATCAGCAC   |
|                              | <i>orf-4_vR</i>             | GATCATCAGCGCAAGCCAGCGAGCTG    |
| <i>orf(-3)</i>               | <i>orf-3_vF1</i>            | GTCCCGTGAGCGAAGCGGTGCGGTGAC   |
|                              | <i>orf-3_vF2</i>            | CCGGTTACGTCCTCTGGTCGGTTCGGG   |
|                              | <i>orf-3_vR</i>             | CGGGTGAGGACGACGGTGCCGTATCGG   |
| <i>orf(-2)</i>               | <i>orf-2_vF1</i>            | GTGACGGCGTTCCGCGAGTACCGCTAC   |
|                              | <i>orf-2_vF2</i>            | GGCAACGCGCTGGGCGCTATCTGGC     |
|                              | <i>orf-2_vR</i>             | CGAGATCCGGTGCGCAGTACACGTGC    |
| <i>orf(-1)</i>               | <i>orf-1_vF1</i>            | CGTTCGCTGTCTATCTGGCGCCTCAGC   |
|                              | <i>orf-1_vF2</i>            | CGAGCTCATCCATGACCACCGTTTCCAG  |
|                              | <i>orf-1_vR</i>             | GGACTGTGGGGAGTGTCTGTGTGGCG    |
| <i>orf1</i>                  | <i>orf1_vF1</i>             | GCACTCCGCTGACCGCCGTAGCCGCAC   |
|                              | <i>orf1_vF2</i>             | CCTGGTCGTGCCGAGCGAGATCGACG    |
|                              | <i>orf1_vR</i>              | CCAGCGCGTCGTCGAACGTGGCCACG    |
| <i>nucU</i>                  | <i>nucU_vF1</i>             | GACGTCGCGCAGGTGGAGTTGCGGG     |
|                              | <i>nucU_vF2</i>             | GGAGCATCCTCGATGAACGCAGCCCTC   |
|                              | <i>nucU_vR</i>              | CACAGGAACAGGAAGTCAAGTGGTGC    |
| <i>orf2</i>                  | <i>orf2_vF1</i>             | GAGCGCAACAGCACGGCCGTGAACCTC   |
|                              | <i>orf2_vF2</i>             | GTGCTCATCACCGTGATCGGTCTGGTG   |
|                              | <i>orf2_vR</i>              | GCTGGTACTTGATGTCCGAGGTGATGC   |
| <i>orf3</i>                  | <i>orf3_vF1</i>             | GACGACTACCGGTACACGTTCTTCGTC   |
|                              | <i>orf3_vF2</i>             | GAGCGCAACAGCACGGCCGTGAACCTC   |
|                              | <i>orf3_vR</i>              | GGCTGATTGGCCATCACCTTCGTCTAC   |
| <i>orf4</i>                  | <i>orf4_vF1</i>             | GCAGACACACCGTTGACGCCGCCGGTCGG |
|                              | <i>orf4_vF2</i>             | CTGGACGACTACCGGTACACGTTCTTCG  |
|                              | <i>orf4_vR</i>              | GTCGATGCGGTGCAGCAGGTGAGCATCG  |
| <i>orf5</i>                  | <i>orf5_vF1</i>             | GGTGCTGTTCCAGTCGTCGTCGACGTG   |
|                              | <i>orf5_vF2</i>             | CTTCTGCGGATCGCGGTGGACCTGCTC   |
|                              | <i>orf5_vR</i>              | CCCTCGCGAGTTTCGGTCCGCTCTGG    |
| <i>nucR</i>                  | <i>nucR_vF1</i>             | GCCTCCACCGCGGTGAACATTTACC     |
|                              | <i>nucR_vF2</i>             | CATGGTCCTCACCTCGGATGCGTC      |
|                              | <i>nucR_vR</i>              | CTCCGAGCTGGTAGGTGACGGCCAG     |
| <i>nucM</i>                  | <i>nucM_vF1</i>             | GGACTCCGACGAATTCTCTACGGCTCGTC |
|                              | <i>nucM_vF2</i>             | CAGGAGCGGACCGAAACTCGCGAGG     |

|               |            |                                |
|---------------|------------|--------------------------------|
|               | nucM_vR    | GGAGATCAGTACGACGTGATCGTAAGGGG  |
| <i>nucG</i>   | nucG_vF1   | GGCATAGGTGGCGAACGAGGCCAG       |
|               | nucG_vF2   | GGCATAGGTGGCGAACGAGGCCAG       |
|               | nucG_vR    | GTTCTGGAACCACTCGCTGTACTGCC     |
| <i>nucN</i>   | nucN_vF1   | GTCGCCTACCAGCAGCGCCAGCTCTC     |
|               | nucN_vF2   | CGGTGACACCGTCGAGAGCTACGACC     |
|               | nucN_vR    | GTACGGCTTCCACAACCTGGCCTTCGG    |
| <i>nucI</i>   | nucI_vF1   | CCTCCAGCAGCAGCTGCACGTGGTC      |
|               | nucI_vF2   | GCCACGGCGGGAGGAATGTGACTGTCTG   |
|               | nucI_vR    | CCGGGTAGTAGGTCTCGCTGTAGGC      |
| <i>nucJ</i>   | nucJ_vF1   | CGGTCTGCACGTGCTGCGCAAGGAC      |
|               | nucJ_vF2   | CGCTGCACTTGTGAGGGTGAAGCGC      |
|               | nucJ_vR    | GACCACGTGCAGCTGCTGCTGGAGGCC    |
| <i>nucK</i>   | nucK_vF1   | CTGCACGAGGACGAGTTCTCAACGTCAGC  |
|               | nucK_vF2   | GCTGCAAGATGGACTGCTCGTTCTGCTAC  |
|               | nucK_vR    | CGTTGTACGTGTGCTGTCAGGCGGTGCTGC |
| <i>nucL</i>   | nucL_vF1   | CCTACGTACGGTTCTCCGGCTGAG       |
|               | nucL_vF2   | GAGCACATGCAGTACTTCCACCCGACG    |
|               | nucL_vR    | CGTTGTCCGACCAGACGTCGACGTCC     |
| <i>nucQ</i>   | nucQ_vF1   | GAGCAGACGCGGACCCGCTCGTAC       |
|               | nucQ_vF2   | CTCTGCGACTTCTCGGCGAGGAACTG     |
|               | nucQ_vR    | GGATGAGGGCGGCATCGTGTGTTCCG     |
| <i>nucP</i>   | nucP_vF1   | CTGTTCCGGCAACTCGCCGACAGCCTCG   |
|               | nucP_vF2   | GGTGAACCTCTGCGCCTACGACGAAC     |
|               | nucP_vR    | CTGCTGCGCCAGCAGGTCGTCGCTGTTG   |
| <i>nucO</i>   | nucO_vF1   | CGCTGGTGCCTACTCGCTCAGGAAG      |
|               | nucO_vF2   | CCAGATGTTCCGTGAGGAGGAGTTCCG    |
|               | nucO_vR    | CTCAGATCCAGTGTGCGGGGTCGGTG     |
| <i>nucV</i>   | nucV_vF1   | CCTGACGCTGCGCTTCGAGGACCTC      |
|               | nucV_vF2   | CGCTGGTGCCTACTCGCTCAGGAAG      |
|               | nucV_vR    | GCCTGGACGCAGTCGCTTTCACGAG      |
| <i>nucPNP</i> | nucPNP_vF1 | CGTCCGCACACACCACATGACCCGAGAC   |
|               | nucPNP_vF2 | GTTCCGCCGACACCGTCGACATCCTGTCC  |
|               | nucPNP_vR  | CACGGCGAGGACCTCCTCGTGCGTGACGC  |
| <i>orf9</i>   | orf9_vF1   | CCTCAGTTGAACGCTCCCCGGTTG       |
|               | orf9_vF2   | GGATCTCGTTCACGACGCGCTCCTCAC    |
|               | orf_vR     | GTAGACGACGAACTGCAGGAACCGCTC    |

**Table S4.** List of primers used to construct complementation plasmids. Uninducible (“native”) plasmids where *tipA* promoter is replaced with a native one are denoted with (noInd), his and NH refer to the presence and absence of a His6-tag on the resulting gene product, respectively.

| TARGET GENE(S)   | PRIMER NAME  | PRIMER SEQUENCE                                |
|------------------|--------------|------------------------------------------------|
| <i>nucA</i>      | nucA_F       | GAAGGGAGCGGACCATGGCAGCCTCATCGACGAACCAGGAGAC    |
|                  | nucA_R       | GTCGACGGAGCTCGAATTCTCACAGAAGTCCCCTTCGCTGAG     |
|                  | nucAnoInd_F  | CAGATGGAGTTCTGAGGTGCGACGAGTCCGTGACCAGGGCCGAC   |
| <i>orf(-3)</i>   | orf-3_F      | GAAGGGAGCGGACCATGGTTGTGCAAGCCGTTTCAGAACGTGTTC  |
|                  | orf-3_R      | GCTCGAGTGCGGCCGCAAGGGCGGTCCGGCCATCGCCCCGGCGTG  |
|                  | orf-3noInd_F | CAGATGGAGTTCTGAGGTGCGCACACGGTGTCCGCAAGCAGGG    |
|                  | orf-3NH_R    | GTCGACGGAGCTCGAATTCTCAGGCGGTCCGGCCATCGCCCCG    |
| <i>orf2</i>      | orf2_F       | GAAGGGAGCGGACCATGGTTCGATCCGAGGATGCCCCGAGAGCG   |
|                  | orf2his_R    | GCTCGAGTGCGGCCGCAAGGCTCTCTCGCATGCCAGCGCGGTG    |
|                  | orf2noInd_F  | CAGATGGAGTTCTGAGGTCCATCGTCTCGCGTCCGGTACCTAC    |
|                  | orf2NH_R     | GTCGACGGAGCTCGAATTCTCAGCTCTCTCGCATGCCAGCGC     |
| <i>orf3</i>      | orf3_F       | GAAGGGAGCGGACCATGGCCGAGTCCCCTCCCCCGCGCG        |
|                  | orf3his_R    | GCTCGAGTGCGGCCGCAAGCGTCGTGCGCAGCGCGGGCGGGAG    |
|                  | orf3noIndF   | CAGATGGAGTTCTGAGGTCCAGCATCGACCGGGCGTTCGTGAG    |
|                  | orf3NH_R     | GTCGACGGAGCTCGAATTCTCAGTCTGCGCAGCGCGGGCGG      |
| <i>nucU+orf2</i> | nucUnoInd_F  | CAGATGGAGTTCTGAGGTGCGGTCTGGAGGTCCGGGTCGACG     |
| <i>orf2+orf3</i> | orf2noInd_F  | CAGATGGAGTTCTGAGGTCCATCGTCTCGCGTCCGGTACCTAC    |
|                  | orf3NH_R     | GTCGACGGAGCTCGAATTCTCAGTCTGCGCAGCGCGGGCGG      |
|                  | orf3orf2_F   | CTGAGATCCGGTCTGCTAACGAAGGGAGCGGACCATGGTTCGATCC |
|                  | orf3orf2_R   | CTAACGTCTGAAAGACGACTCAGTGGTGGTGGTGGTGGTCTCG    |
| <i>nucN</i>      | nucN_F       | CCGCGCGGCAGCCATATGGGCCGGTCCGACACGACACCC        |
|                  | nucN_R       | GTCGACGGAGCTCGAATTCGTTGCGGCGTCACACGTACATCG     |
| <i>nucK</i>      | nucK_F       | GAAGGGAGCGGACCATGGCAGGCCGACTCGGTCCCCTTCTC      |
|                  | nucK_R       | GTCGACGGAGCTCGAATTCGTTGTACGTGTGCTGTCAGGCGGTG   |
| <i>nucQ</i>      | nucQ_F       | GAAGGGAGCGGACCATGGCGCACATCAGTGACCGTCTCGC       |
| <i>nucO</i>      | nucQ_R       | GCTCGAGTGCGGCCGCAAGCTCATCGGCTCCTCCAGGGATGAG    |
|                  | nucO_F       | GAAGGGAGCGGACCATGGCCCCGACCGGCCACCCGCATCCC      |
|                  | nucO_R       | GCTCGAGTGCGGCCGCAAGGATCCAGTGTGCGGGGTCGGTGTAG   |

**Table S5.** List of ORFs involved in the biosynthesis of nucleocidin in *S. calvus* and *S. virens*.

| <b>ORF</b>    | <b>Annotation</b>                                | <b>Accession number in <i>S. calvus</i></b> | <b>Accession number in <i>S. virens</i></b> | <b>Protein sequence similarity</b> |
|---------------|--------------------------------------------------|---------------------------------------------|---------------------------------------------|------------------------------------|
| <b>orf-3</b>  | Cysteine dioxygenase                             | WP_233452298                                | MYS29810                                    | 100.00%                            |
| <b>orf-2</b>  | NUDIX hydrolase                                  | WP_142191275                                | MYS29809                                    | 98.56%                             |
| <b>orf-1</b>  | Protein of unknown function                      | WP_142191276                                | MYS29808                                    | 98.7%                              |
| <b>orf1</b>   | Oxidoreductase                                   | WP_142191277                                | MYS29807                                    | 99.70%                             |
| <b>nucU</b>   | Cation: proton antiporter                        | WP_233452300                                | MYS29806                                    | 99.34%                             |
| <b>orf2</b>   | Hypothetical protein                             | WP_142191278                                | MYS29805                                    | 100.00%                            |
| <b>orf3</b>   | Histidine phosphatase family protein             | WP_233452302                                | MYS29804                                    | 98.92%                             |
| <b>orf4</b>   | Transcriptional regulatory protein               | WP_267905327                                | MYS29803                                    | 98.44%                             |
| <b>orf5</b>   | Aminoglycoside phosphotransferase                | WP_182674813                                |                                             |                                    |
| <b>nucR</b>   | Inner membrane metabolite transport protein YhjE | WP_182674811                                | MYS30223                                    | 99.77%                             |
| <b>nucM</b>   | Hypothetical protein                             | WP_142191281                                |                                             |                                    |
| <b>nucG</b>   | Sulfatase                                        | WP_142191282                                |                                             |                                    |
| <b>nucN</b>   | Amidinotransferase                               | WP_142191283                                | MYS28573                                    | 99.39%                             |
| <b>nucI</b>   | Sulfatase                                        | WP_142191284                                | MYS28574                                    | 100.00%                            |
| <b>orf6</b>   | StrR-like transcriptional regulator              | WP_142191285                                | MYS28575                                    | 99.15%                             |
| <b>nucJ</b>   | Radical SAM superfamily protein                  | WP_142191286                                | MYS28576                                    | 100.00%                            |
| <b>nucK</b>   | Sulfotransferase domain protein                  | WP_142191287                                | MYS28577                                    | 100.00%                            |
| <b>nucL</b>   | SAM-dependent methyltransferase                  | WP_202432158                                | MYS29784                                    | 99.60%                             |
| <b>nucQ</b>   | Rubryerythrin                                    | WP_142191288                                | MYS29783                                    | 100.00%                            |
| <b>nucP</b>   | Methyltransferase                                | WP_142191289                                | MYS29782                                    | 99.85%                             |
| <b>nucO</b>   | Sulfotransferase                                 | WP_233452305                                | MYS29781                                    | 100.00%                            |
| <b>nucV</b>   | Adenine phosphoribosyltransferase                | WP_142191290                                | MYS29780                                    | 100.00%                            |
| <b>orf7</b>   | LuxR family transcriptional regulator            | WP_142230912                                | MYS29779                                    | 99.44%                             |
| <b>nucPNP</b> | S-methyl-5'-thioadenosine phosphorylase          | WP_142191292                                | MYS29778                                    | 100.00%                            |
| <b>orf8</b>   | Lycopene cyclase                                 | WP_182674809                                | MYS28276                                    | 99.56%                             |
| <b>nucGT</b>  | Glucosyltransferase                              | WP_142191293                                | MYS28275                                    | 100.00%                            |
| <b>orf9</b>   | Hypothetical protein                             | WP_142191294                                | MYS28274                                    | 99.84%                             |
| <b>orf10</b>  | Protein kinase domain containing protein         | WP_142191295                                | MYS28273                                    | 99.72%                             |
| <b>nucBGS</b> | Beta-glucosidase                                 | WP_142191296                                | MYS28272                                    | 100.00%                            |

### 3. Supplementary figures

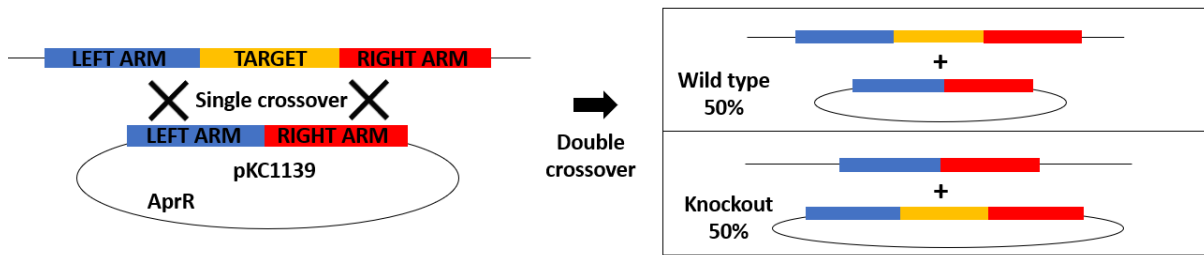

**Figure S1. Gene deletion strategy used in this study.** “Target” region denotes ~2/3 of gene to be deleted, including the start codon, so that the “right arm” region contains the terminal portion (usually about a third) of the gene. Single crossover occurs when the cells containing the knockout plasmid are grown in the presence of apramycin at temperature  $>32^{\circ}\text{C}$ . After several generations on plates without the antibiotic and at  $<32^{\circ}\text{C}$  colonies are screened for apramycin resistance – the genotype of the sensitive colonies is verified with PCR as the expected ratio of knockout to wild type colonies is 1:1.



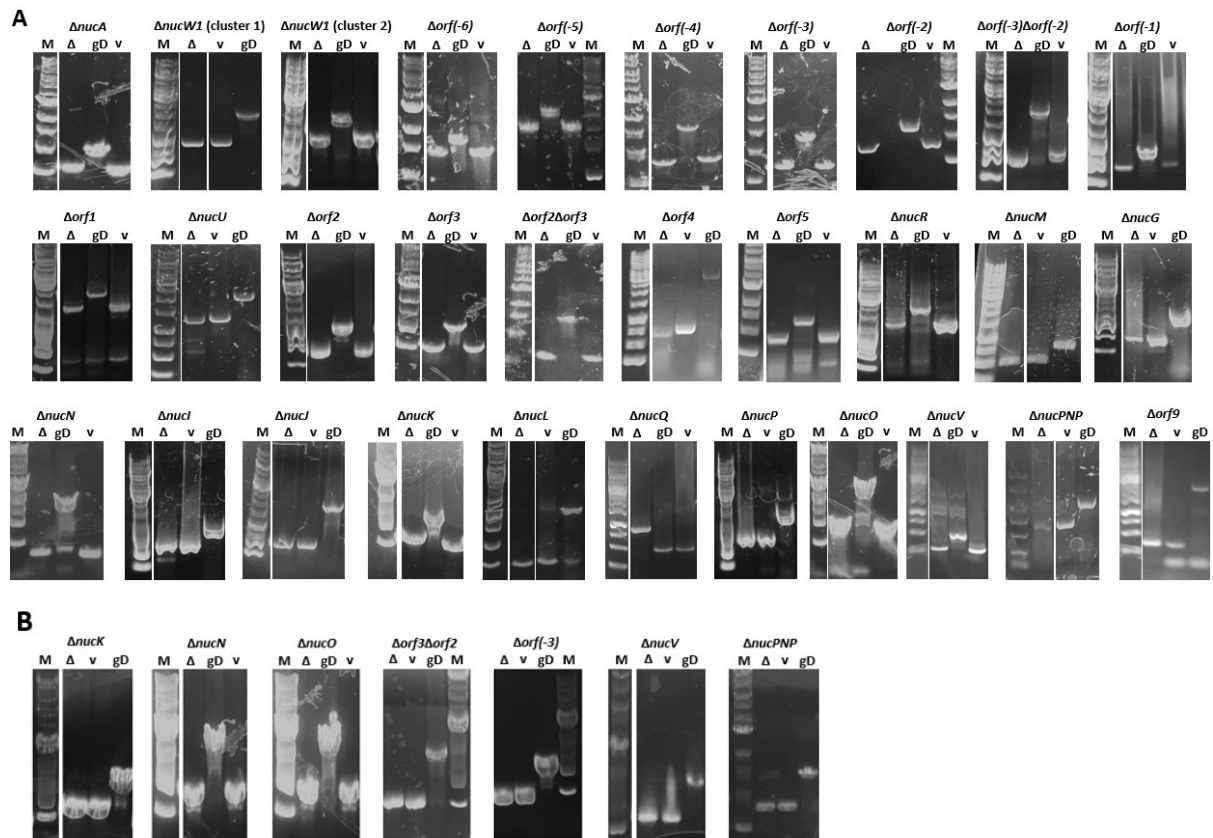

**Figure S2.** PCR verifications of individual gene knockouts. A – knockouts in *S. calvus*, B – in *S. vires*. Genomic DNA (gD) and the vector used in generating the knockout (v) were used as templates in control reactions.



LC-MS data of the standard 9~11 can be found in ref [3]

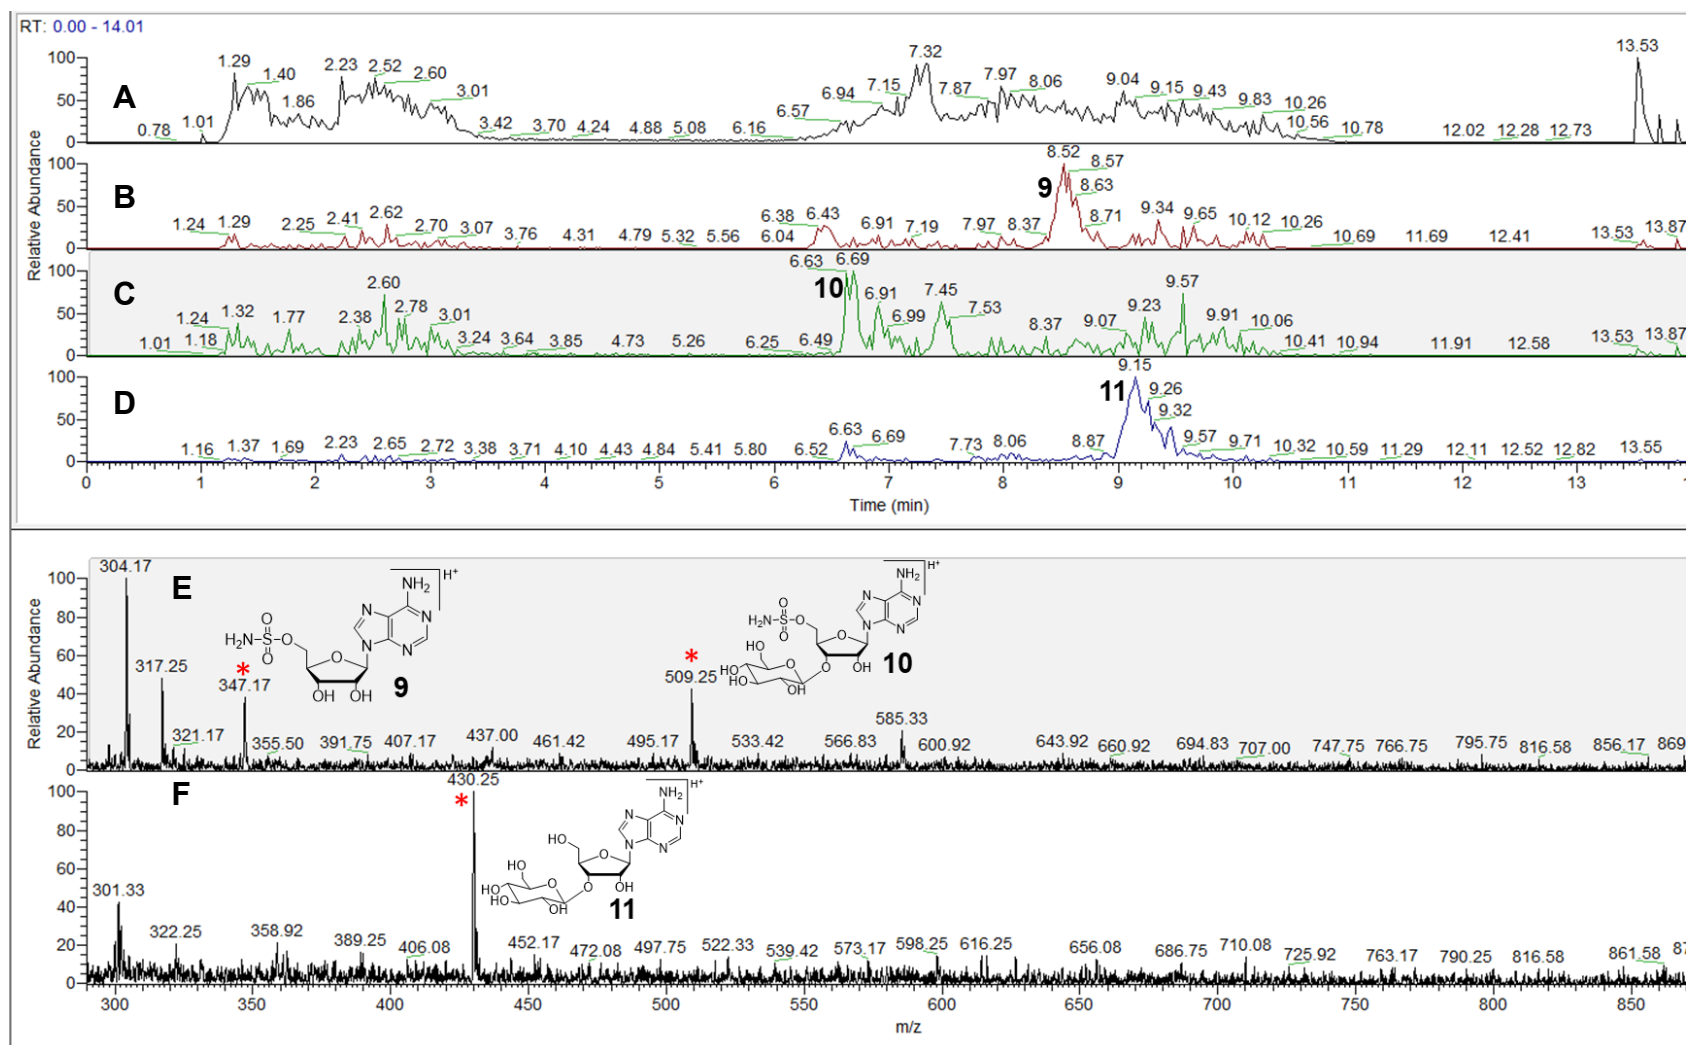

**Figure S4.** LC-MS analysis of: (A) total ion of *S. calvus*  $\Delta orf2\Delta orf3$  media extract; (B-D) ion extraction of 9, 10 and 11; (E) molecular ions of 9 and 10; (F) molecular ions of 11.

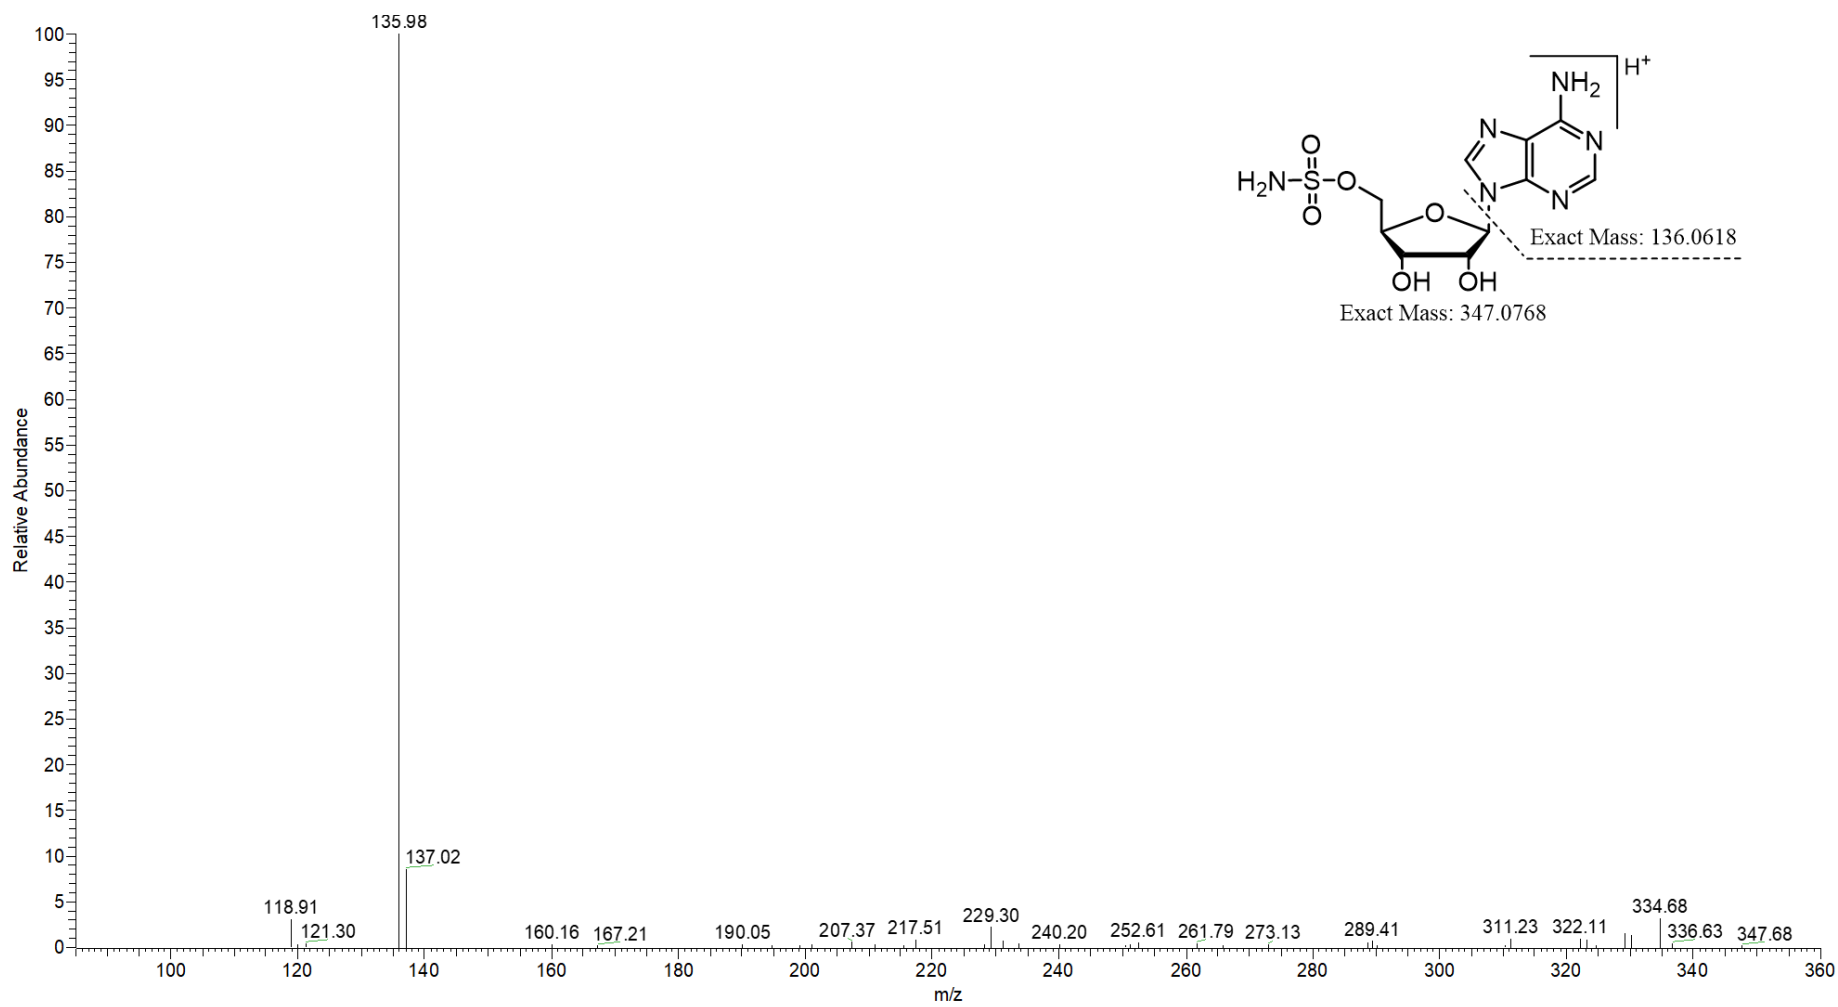

**Figure S5.** Daughter ion  $[M+H]^+=135.98$  amu of **9** extracted from total ions of *S. calvus*  $\Delta orf2\Delta orf3$  media extract.

dORF23d6minus #521 RT: 6.64 AV: 1 NL: 6.21E2  
F: ITMS + c ESI d Full ms2 509.19@cid35.00 [130.00-520.00]

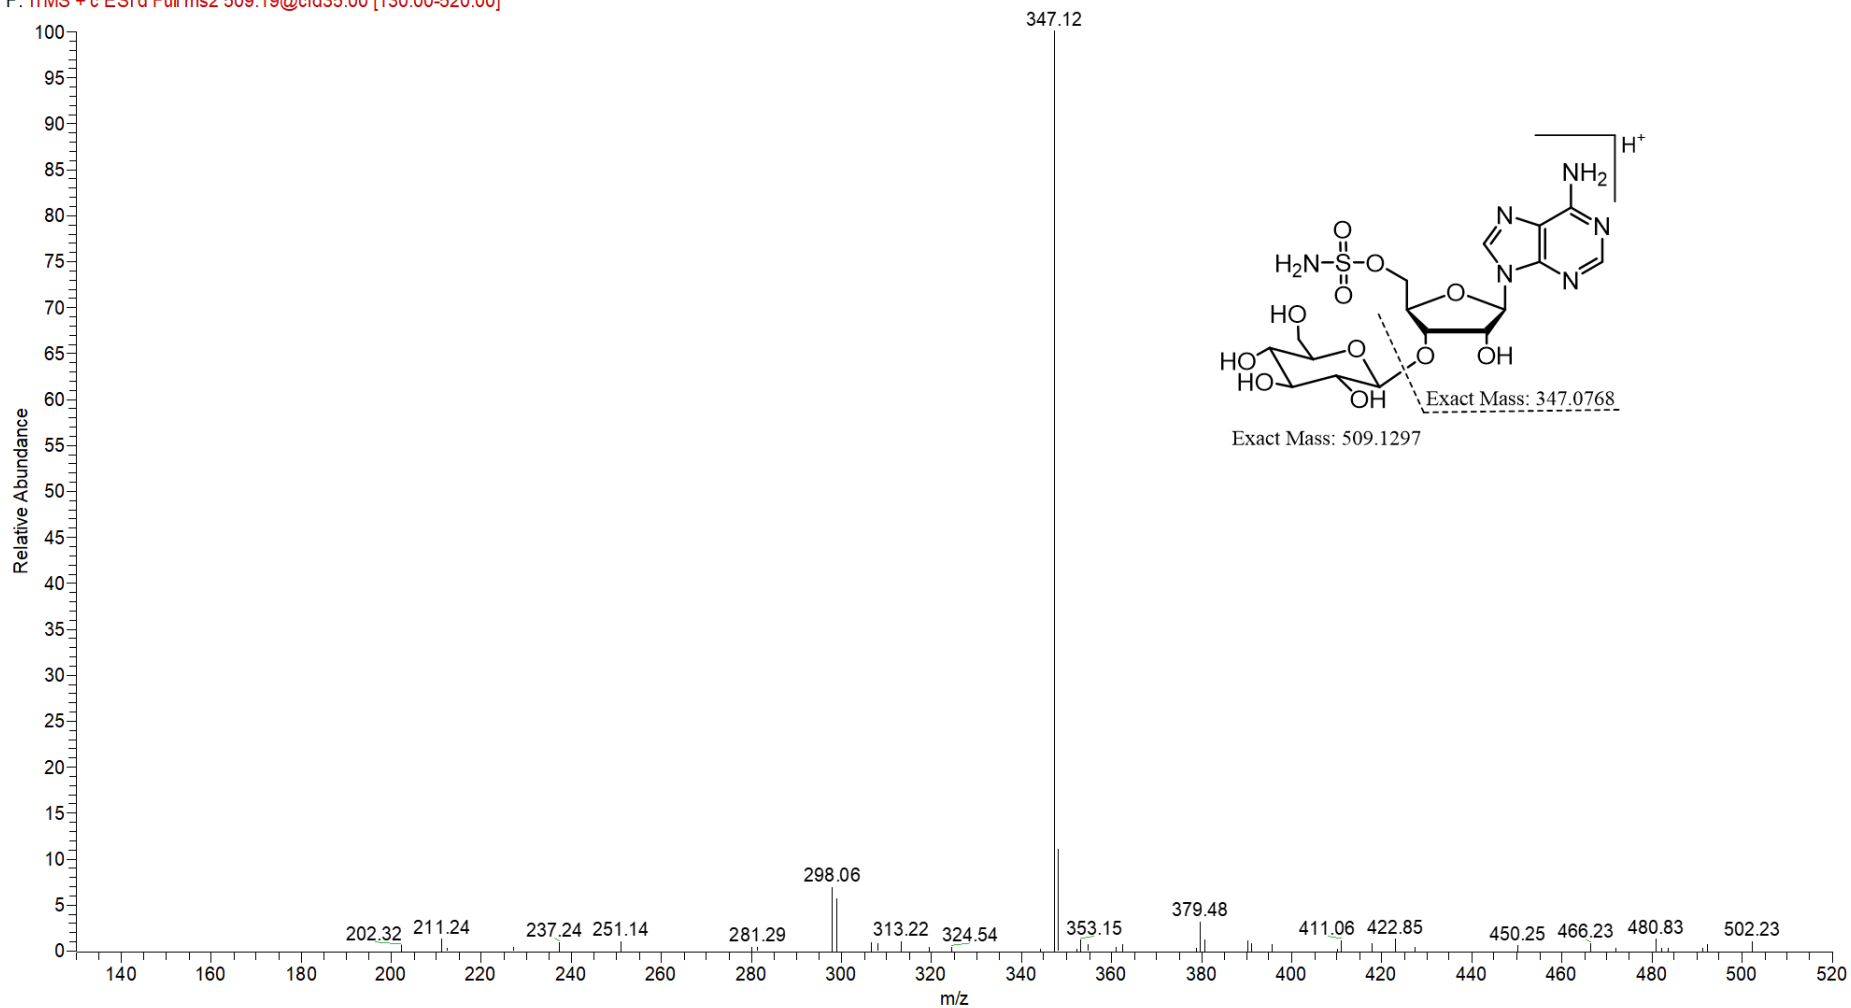

**Figure S6.** Daughter ion  $[M+H]^+=347.12$  amu of **10** extracted from total ions of *S. calvus*  $\Delta orf2\Delta orf3$  media extract.

dORF23d6minus #503 RT: 6.39 AV: 1 NL: 4.31E2  
F: ITMS + c ESI d Full ms2 430.10@cid35.00 [105.00-445.00]

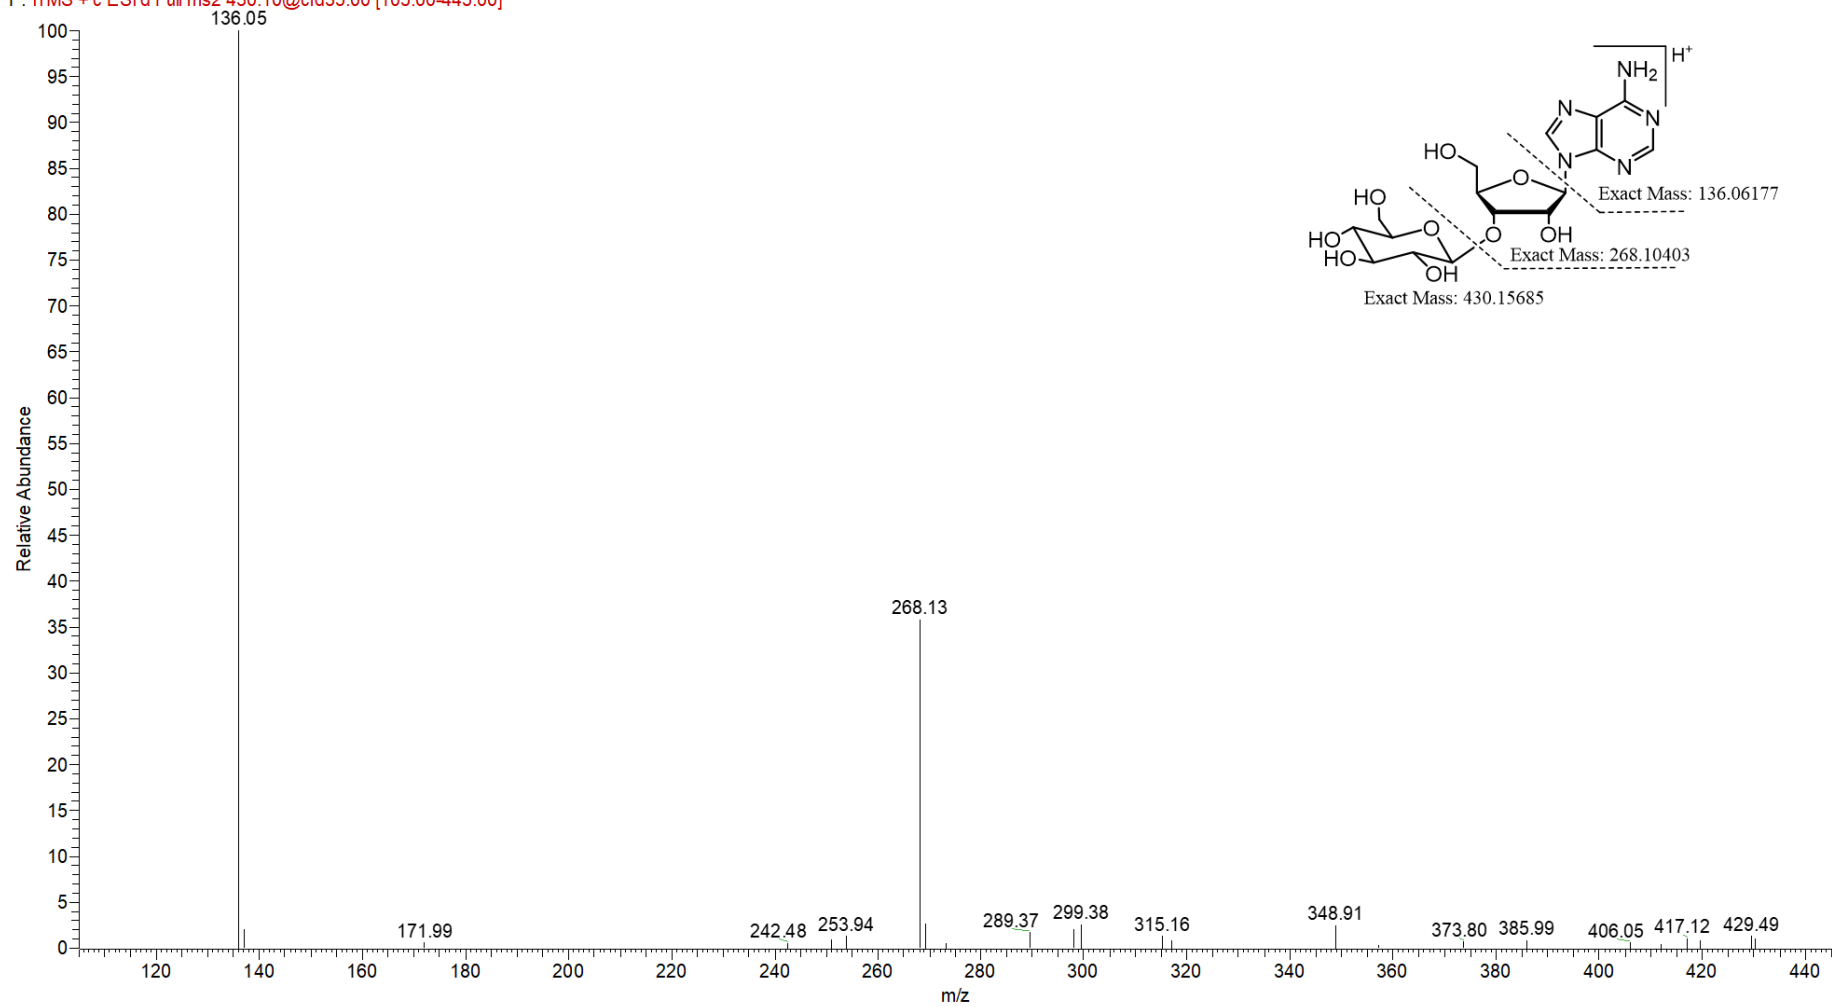

**Figure S7.** Daughter ions  $[M+H]^+=136.05$  and  $[M+H]^+=268.13$  amu of **11** extracted from total ions of *S. calvus*  $\Delta orf2\Delta orf3$  media extract.

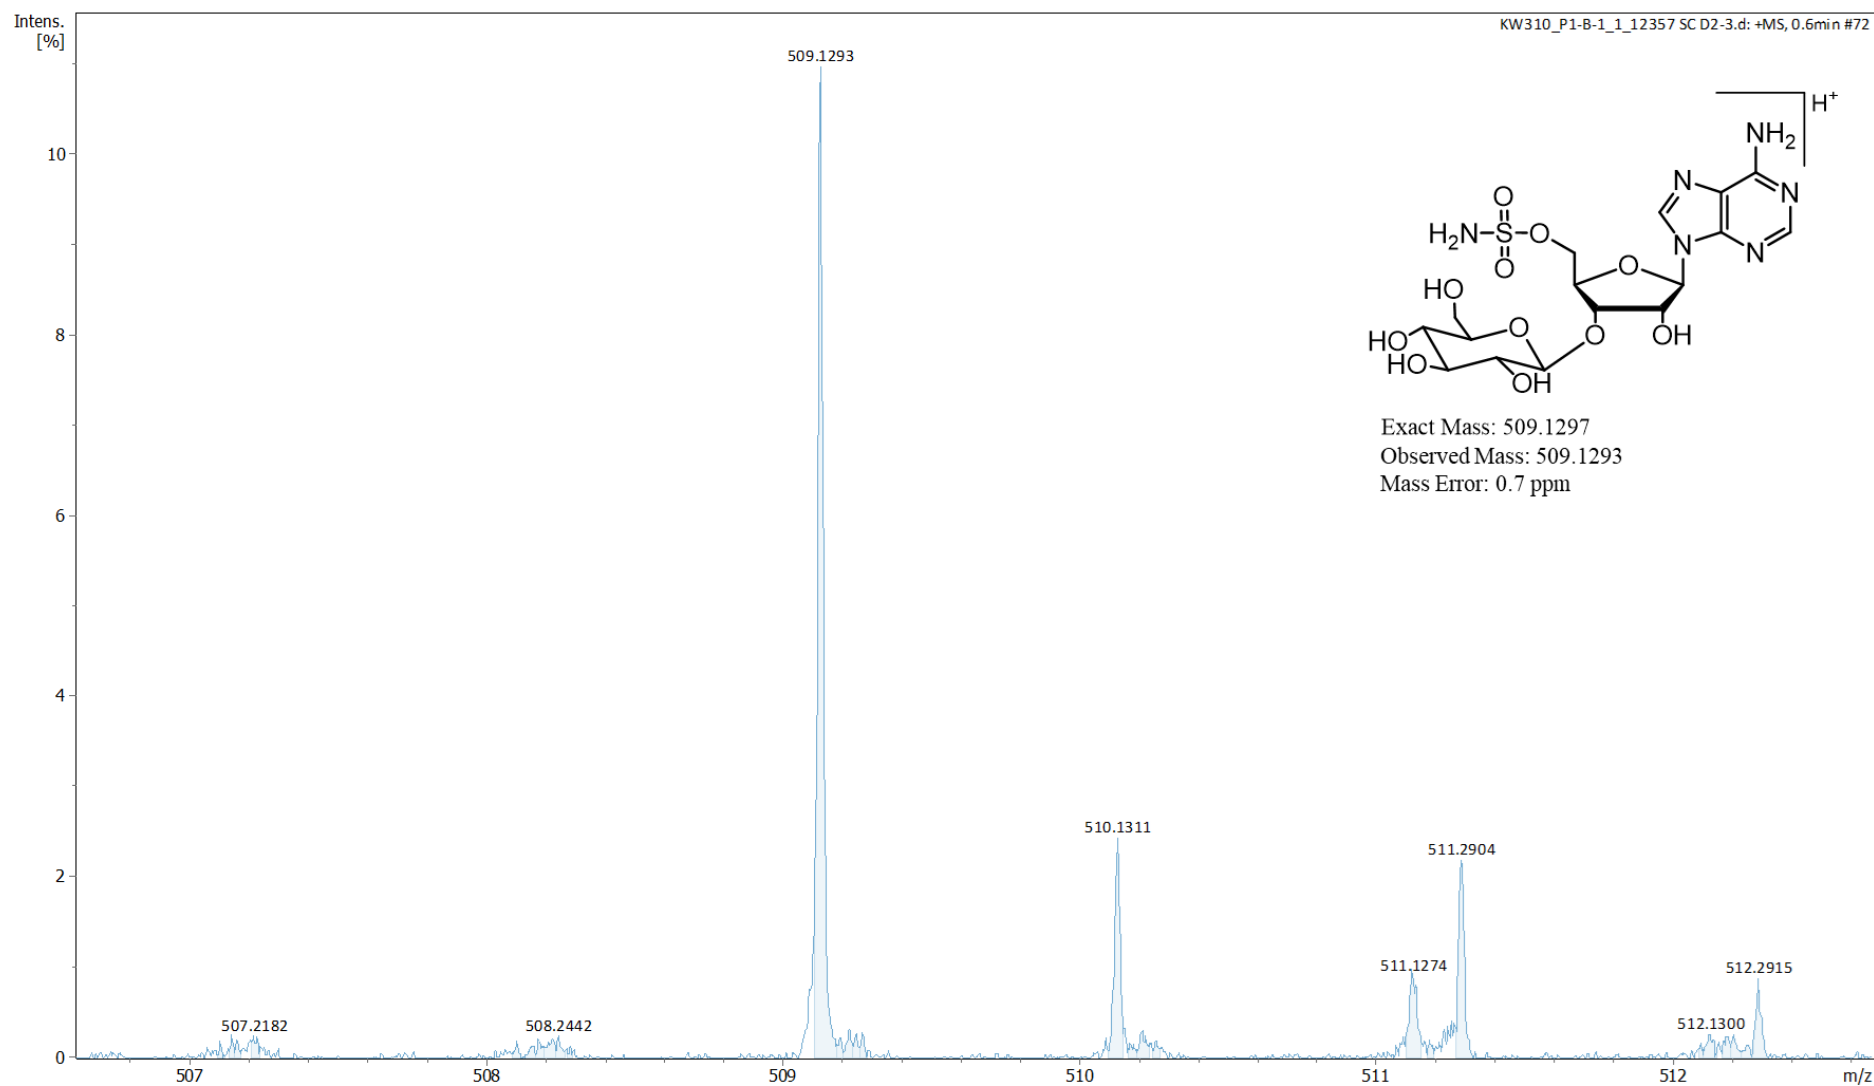

**Figure S8.** High resolution MS of **10** extracted from total ions of *S. calvus*  $\Delta orf2\Delta orf3$  media extract.

ORF24AND5D7 #530-564 RT: 6.07-6.44 AV: 18 NL: 2.14E3  
F: ITMS + p ESI Full ms [79.00-600.00]

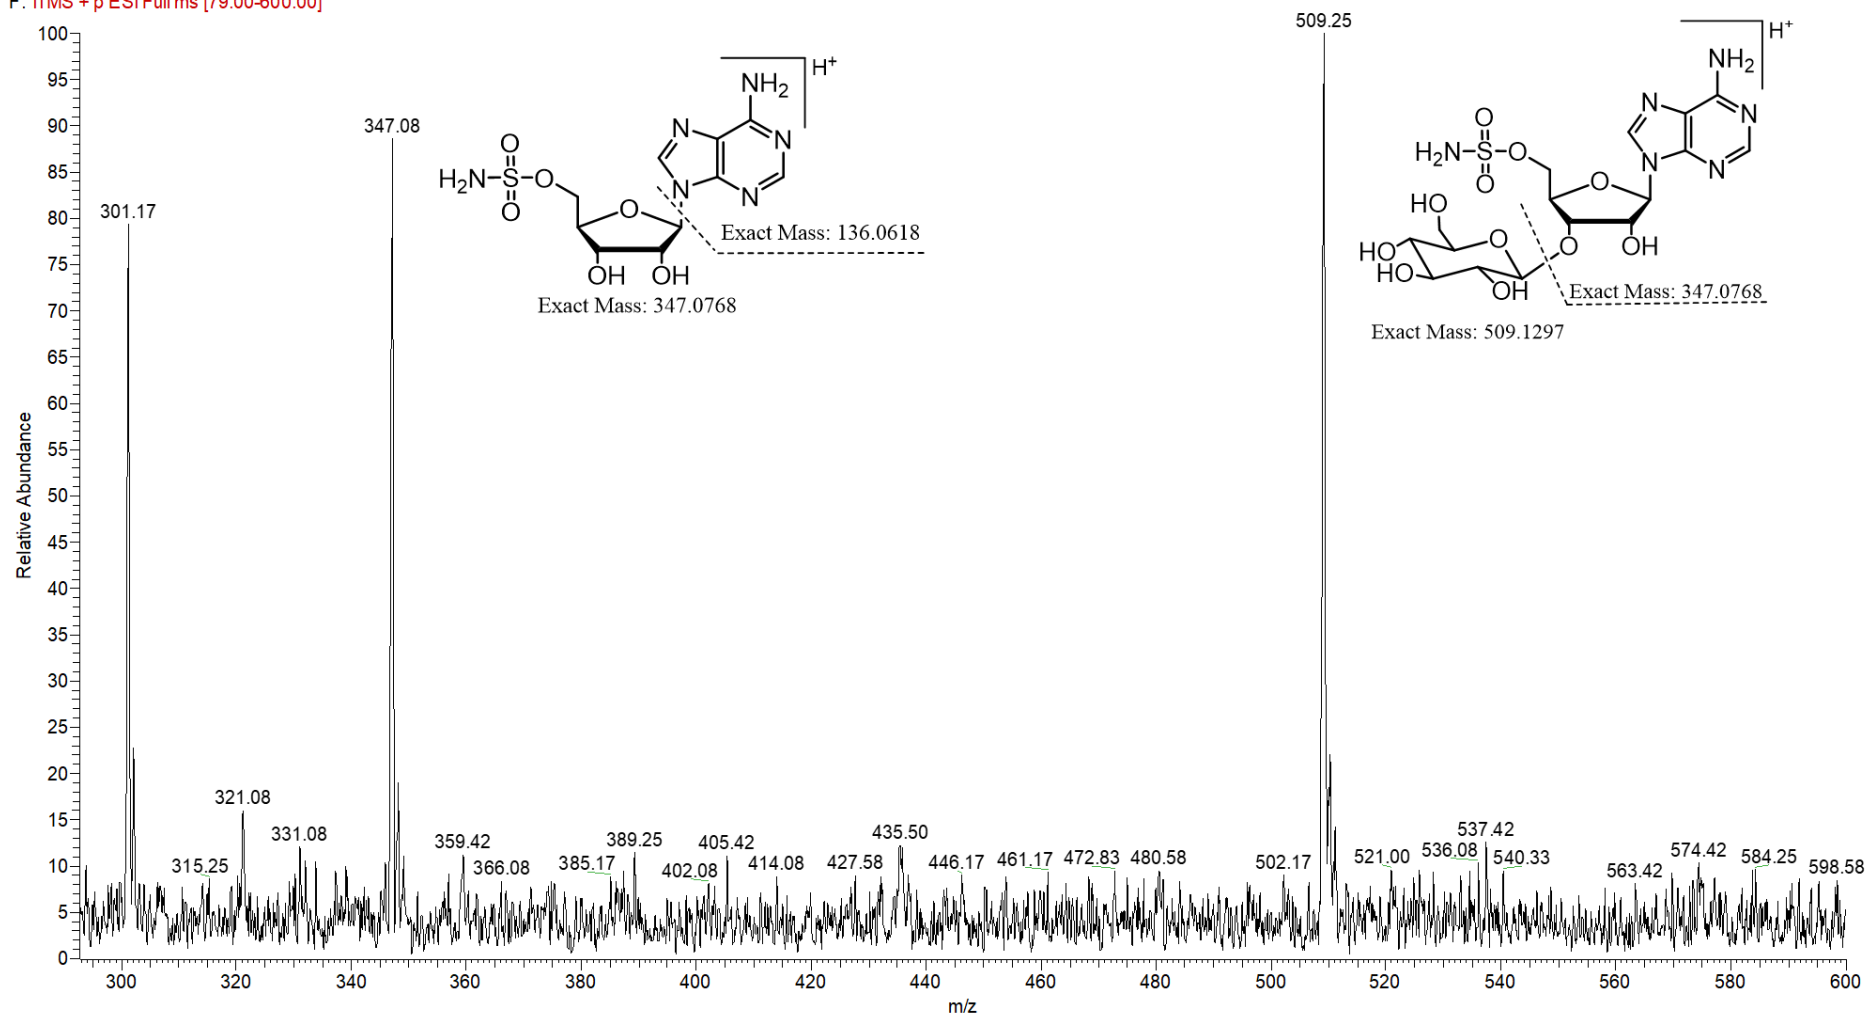

**Figure S9.** Extracted molecular ions of **9** and **10** from *S. calvus*  $\Delta orf2$  media extract.



ORF25D7 #553 RT: 6.28 AV: 1 NL: 7.59E3

F: ITMS + c ESI d Full ms2 347.00@cid35.00 [85.00-360.00]

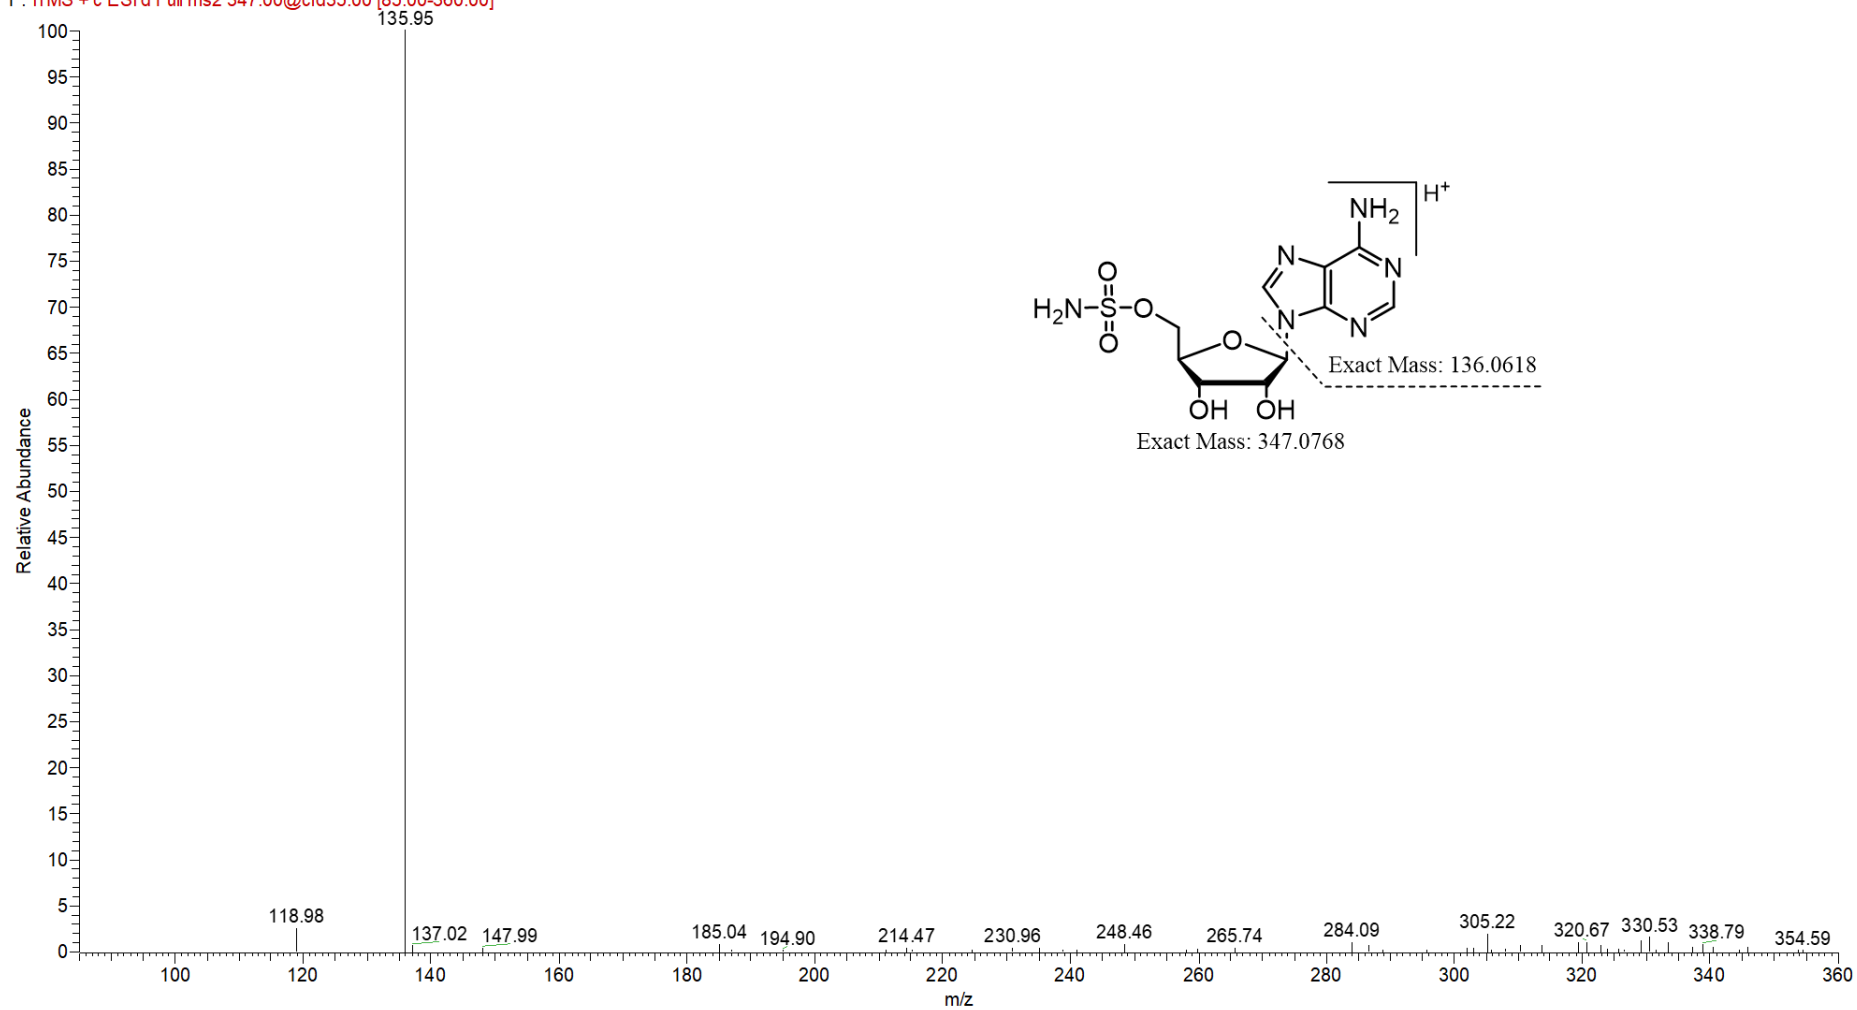

**Figure S10.** Daughter ion  $[M+H]^+=135.98$  amu of **9** extracted from total ions of *S. calvus*  $\Delta orf2$  media extract.

ORF25D7 #549 RT: 6.24 AV: 1 NL: 3.21E3  
F: ITMS + c ESI d Full ms2 509.24@cid35.00 [130.00-520.00]

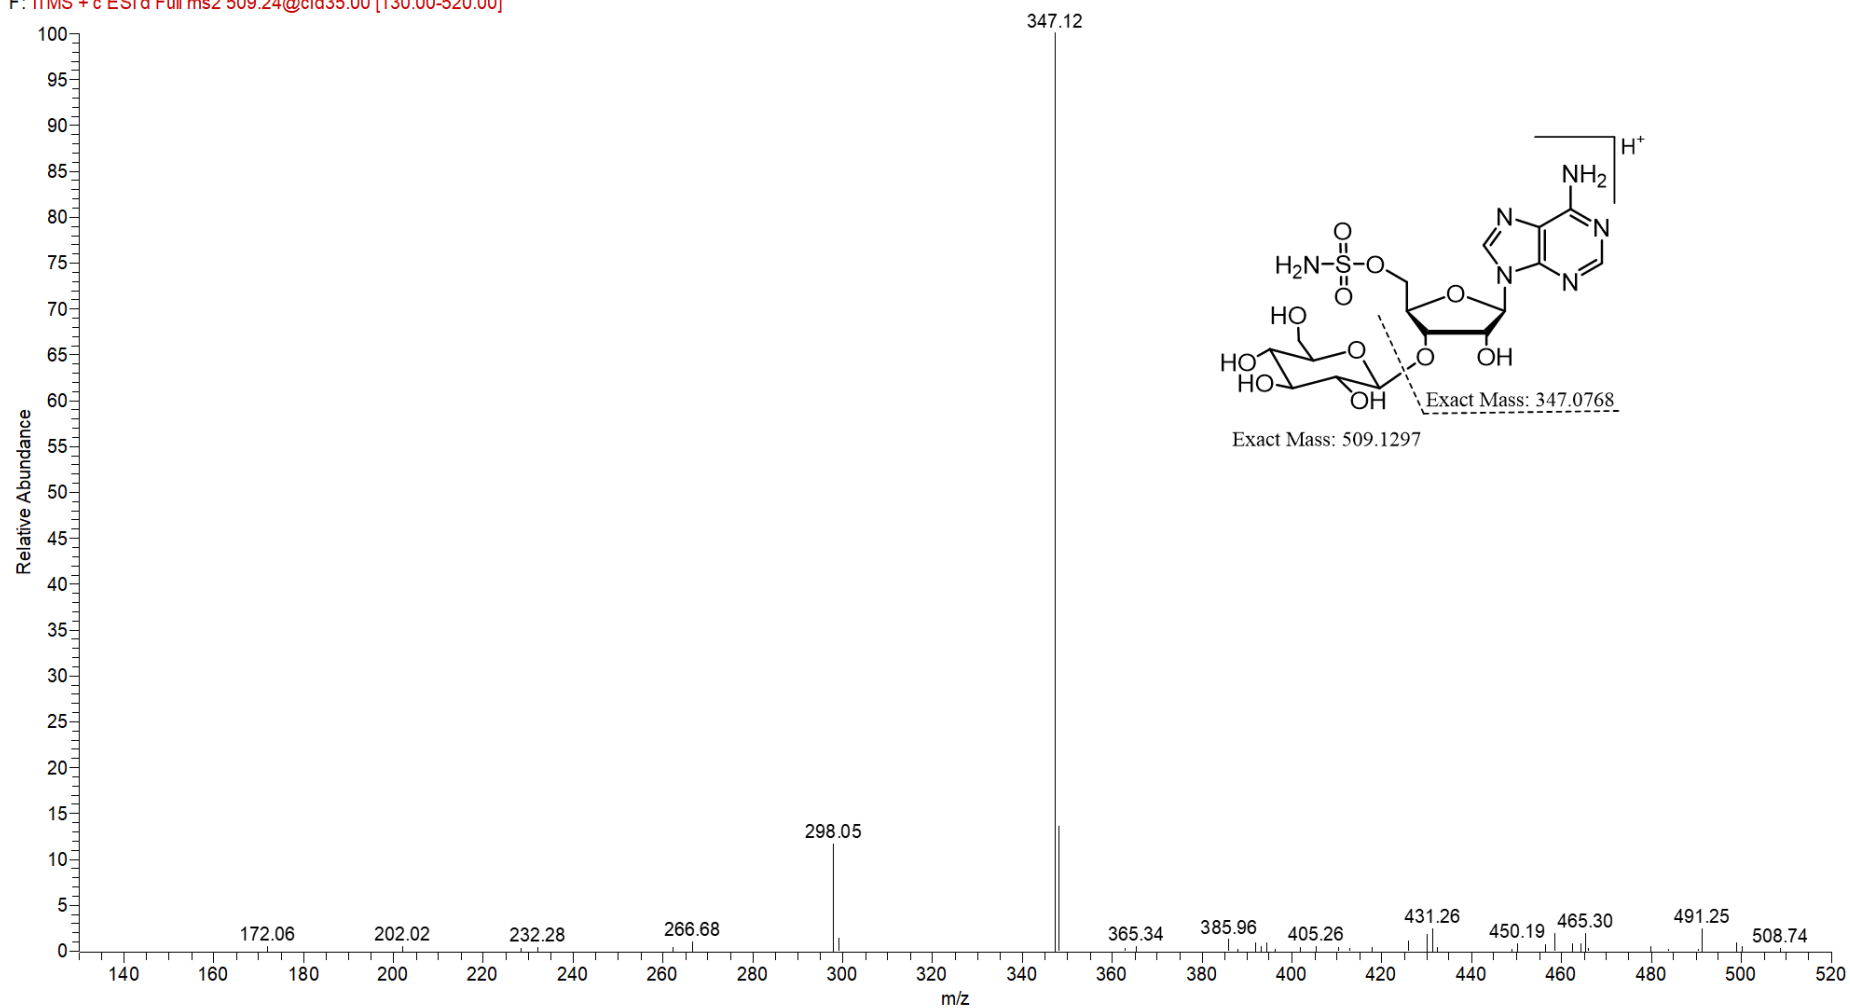

**Figure S11.** Daughter ion  $[M+H]^+=347.12$  amu of **10** extracted from total ions of *S. calvus*  $\Delta orf2$  media extract.

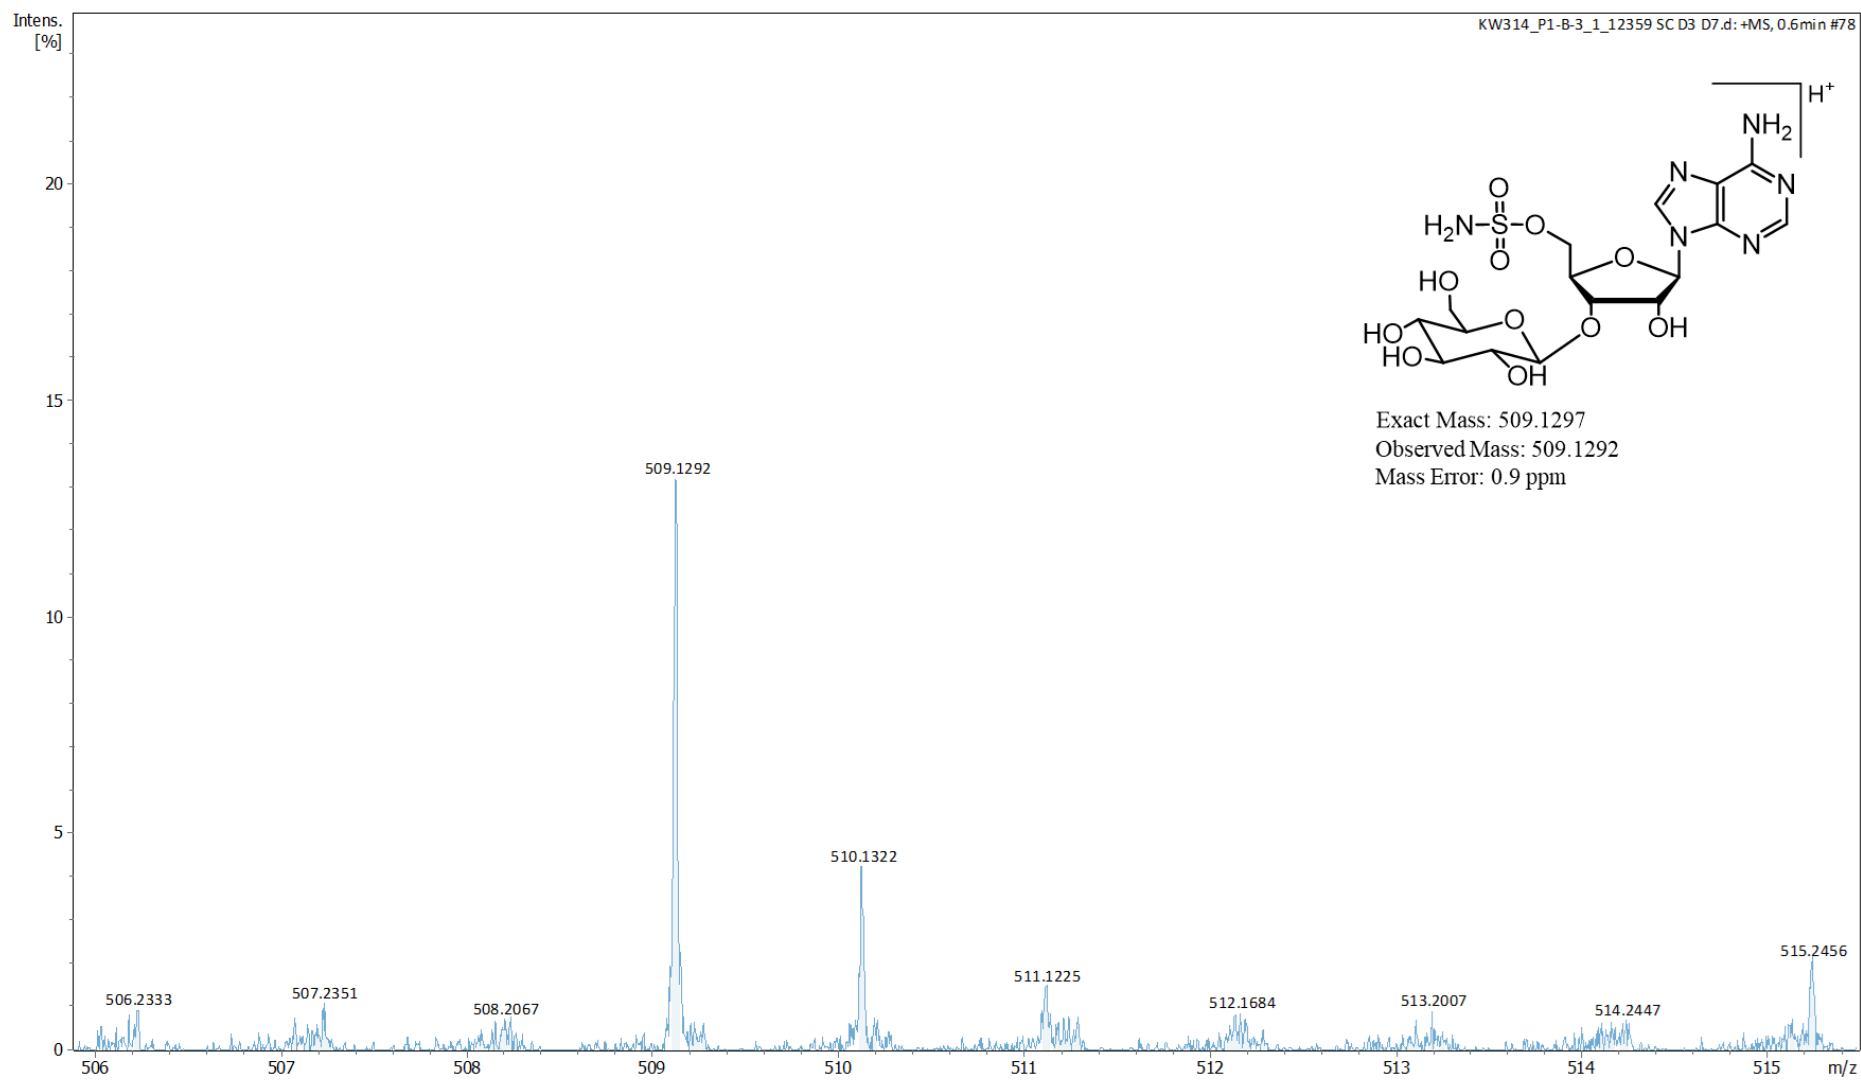

**Figure S12.** High resolution MS  $[M+H]^+=509.1292$  amu (error=0.9 ppm) of **10** from *S. calvus*  $\Delta orf(-3)$  media extract.

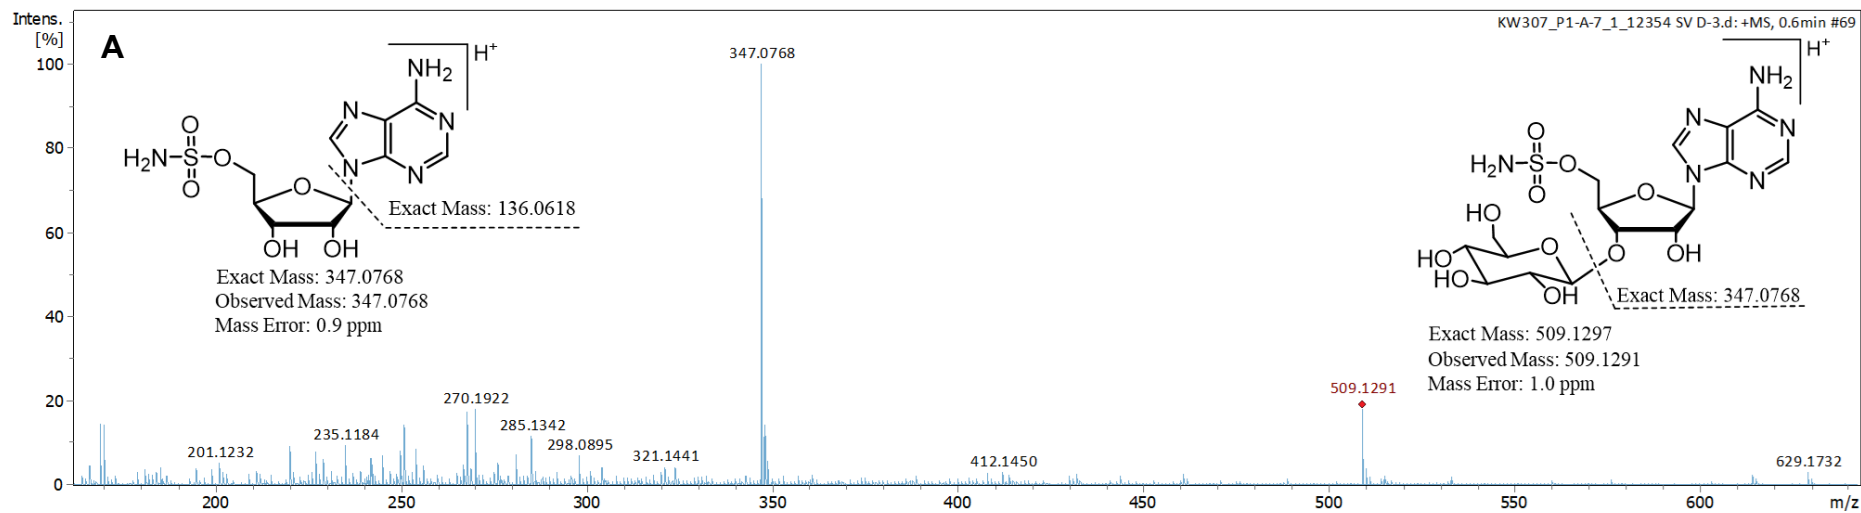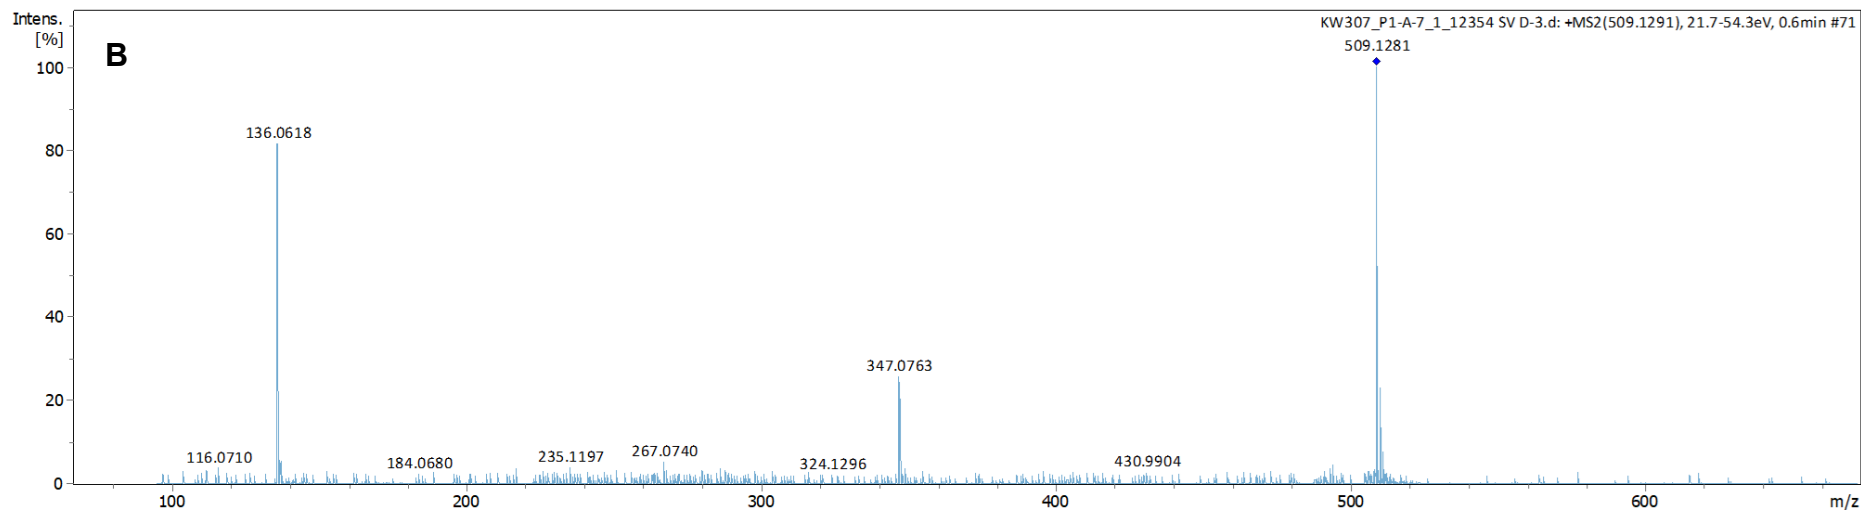

**Figure S13.** High resolution MS (A) and secondary MS (B) of **10** from *S. virens*  $\Delta$ *orf(-3)* media extract.

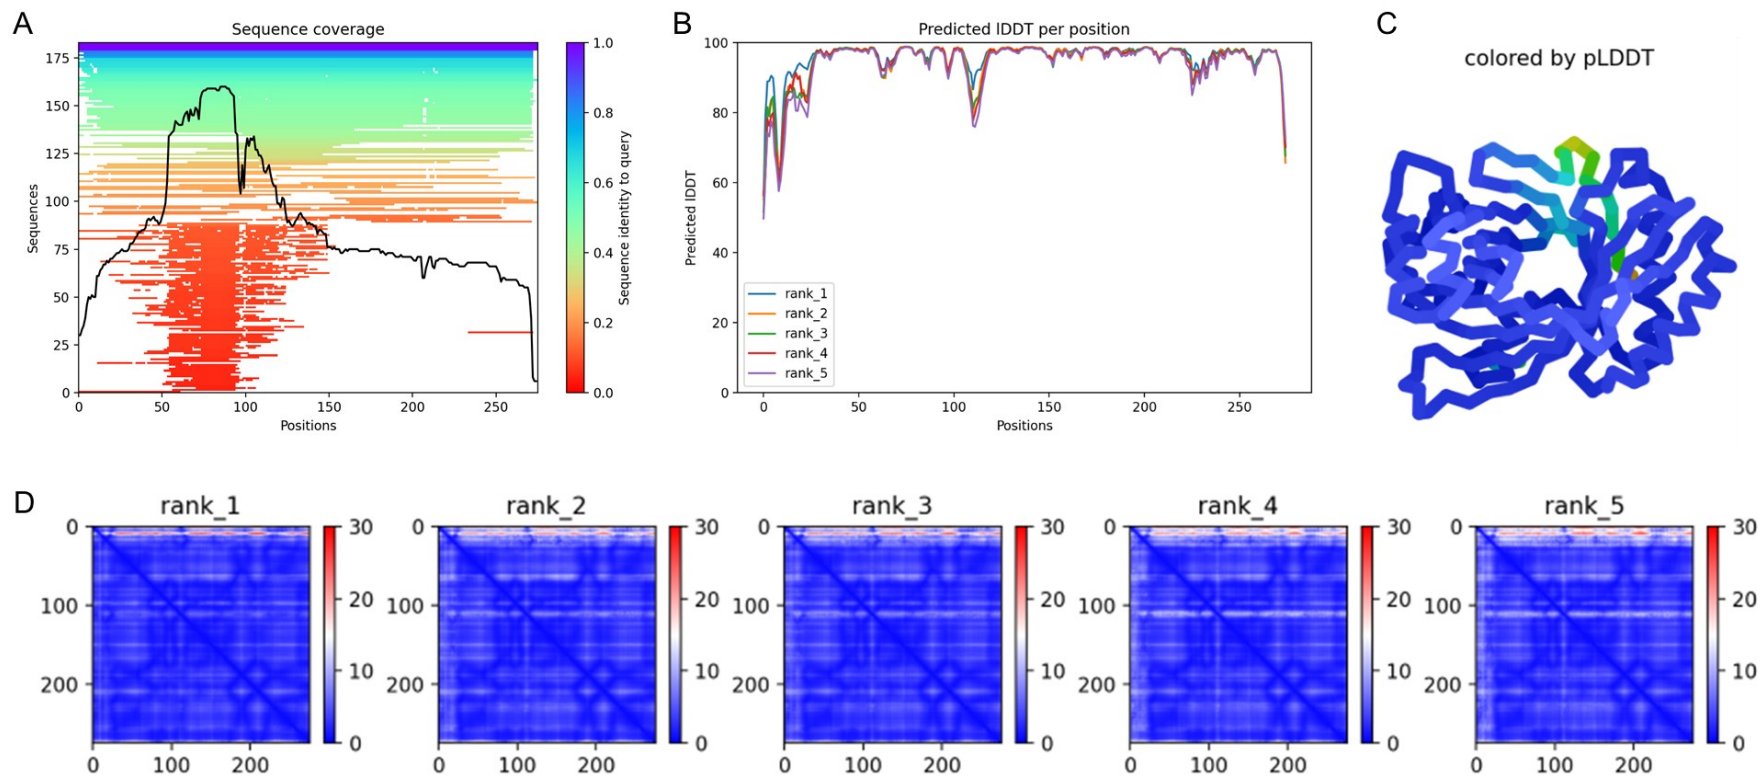

**Figure S14.** Assessment of AlphaFold2-generated structure of Orf2. A – sequence coverage plot, B – predicted local distance difference test plot (pLDDT), C – Orf2 structure coloured according to pLDDT, D – predicted aligned error plot (PAE).

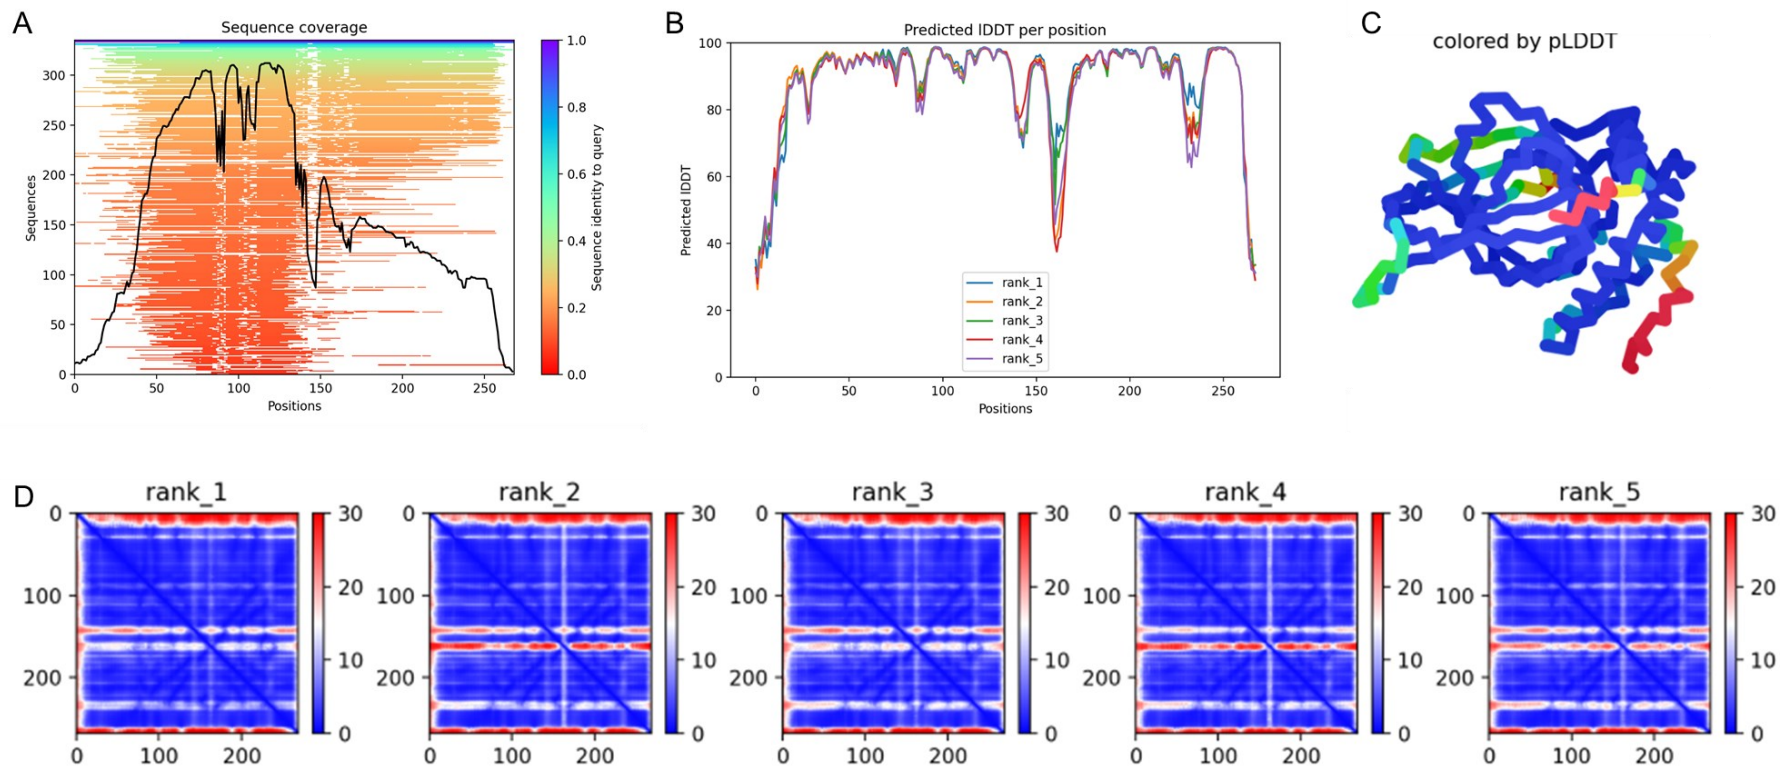

**Figure S15.** Assessment of AlphaFold2-generated structure of Orf(-3). A – sequence coverage plot, B – predicted local distance difference test plot (pLDDT), C – Orf(-3) structure coloured according to pLDDT, D – predicted aligned error plot (PAE).

## 5. References

- [1] M. Bierman, R. Logan, K. O'Brien, E.T. Seno, R. N. Rao and B. E. Schoner, *Gene*, **1992**, *116*, 43–49
- [2] G. Muth, *Appl Microbiol Biotechnol.*, **2018**, *102*, 9067-9080
- [3] X. Feng, D.Bello and D. O'Hagan, *RSC Adv.*, **2021**, *11*, 5291-5294
